# Supplementary material for: HOXC10 overexpression promotes cell proliferation and migration in gastric cancer
Source: PubMed Central journal article supplement — Oncol Rep. 2019 May 17;42(1):202–12. doi: 10.3892/or.2019.7164 (PMC6549078; doi:10.3892/or.2019.7164), 2019-05-17
Supplement: Supplementary_Data.pdf [file Supplementary_Data.pdf]

Figure S1. Silencing of *S100P* suppresses gastric cancer cell proliferation. (A) RT-qPCR of *S100P* in *S100P*-silenced AGS cells. (B) Proliferation assay (CCK-8) in *S100P*-silenced AGS cells. (C) Colony formation assay in *S100P*-silenced AGS cells. CCK-8, Cell Counting Kit-8. \*\* $P < 0.01$ ; \*\*\* $P < 0.001$ , Student's t-test. The error bars represent the mean  $\pm$  SD.

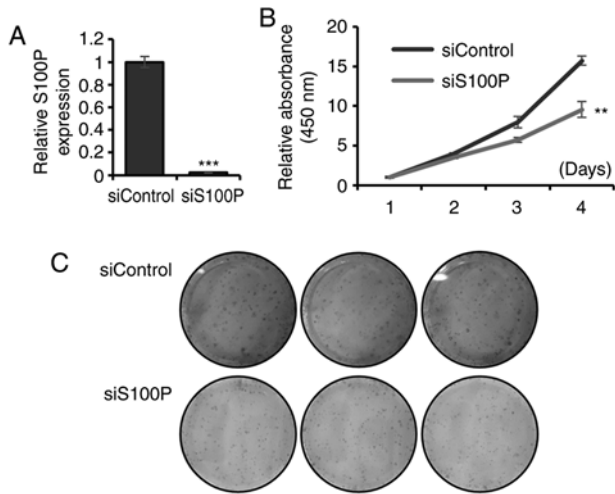

Figure S2. Association with *HOXC10* and NF- $\kappa$ B pathway. (A) GSEA showing enrichment of genes in the NF- $\kappa$ B pathway. (B) *TLR4* expression levels from RNA-sequencing in response to ectopic *HOXC10* overexpression in AGS cells. *HOXC10*, homeodomain-containing gene 10; GSEA, Gene Set Enrichment Analysis.

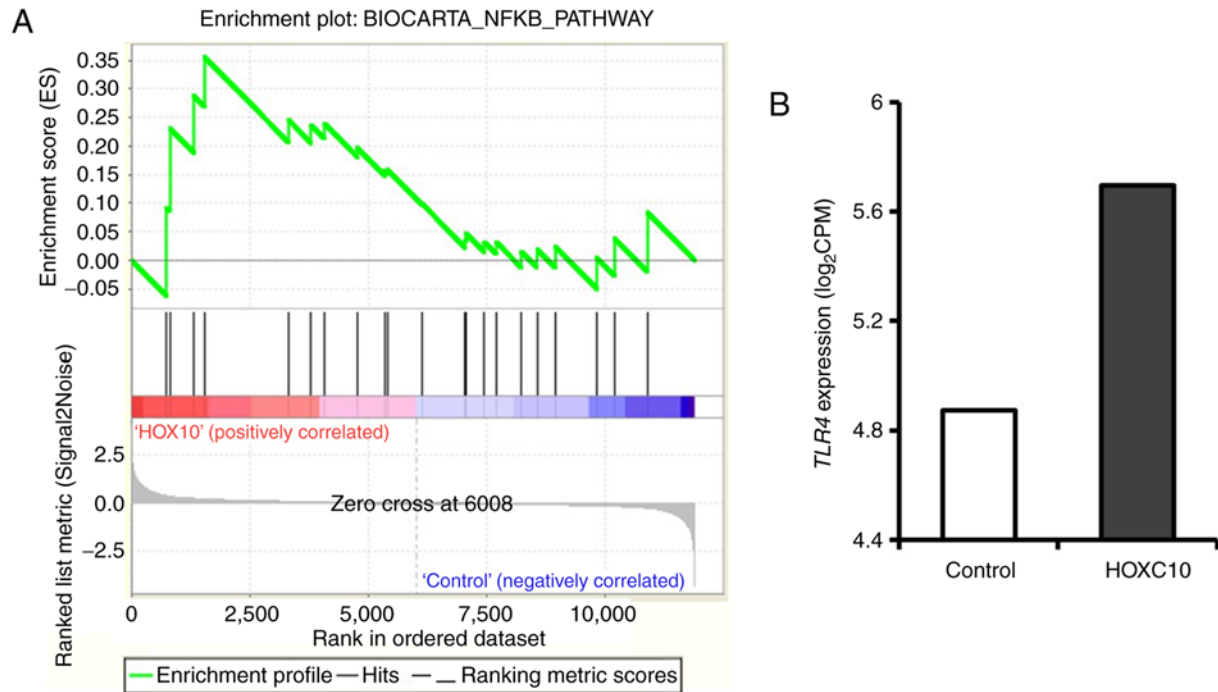

Table SI. Primer sequences for RT-PCR.

| Primer                | Primer sequence (5'-3')                 | Application |
|-----------------------|-----------------------------------------|-------------|
| HOXC10                |                                         | RT-PCR      |
| Forward               | ctcggataacgaagcgaag                     |             |
| Reverse               | cgctctcgcgtcaaatacat                    |             |
| HOXC10 clone          |                                         | Cloning     |
| Forward               | gtagctagcgccaccatgaca<br>tgcctcgcgaatg  |             |
| Reverse               | gtagcggcgcgtcaggtgaaa<br>ttaaattggaggtc |             |
| CST1                  |                                         | RT-PCR      |
| Forward               | acaaggccaccaagatgac                     |             |
| Reverse               | ttgacacctggattcacca                     |             |
| S100P                 |                                         | RT-PCR      |
| Forward               | taccaggcttctgcagagt                     |             |
| Reverse               | ctccagggcatcatttgagt                    |             |
| FSCN1                 |                                         | RT-PCR      |
| Forward               | actggctacacgctggagtt                    |             |
| Reverse               | cccattcttctggaggtca                     |             |
| TRIB3                 |                                         | RT-PCR      |
| Forward               | tccagaaacgagctcgaagt                    |             |
| Reverse               | gacaaagcgacacagcttga                    |             |
| CST1 promoter region  |                                         | ChIP-PCR    |
| Forward               | ggggccagtccaaaattact                    |             |
| Reverse               | cgaactcacgagcaattgaa                    |             |
| CST1 TSS region       |                                         | ChIP-PCR    |
| Forward               | gctgccaagcaggataaat                     |             |
| Reverse               | ggagcagcagggtactcaga                    |             |
| S100P promoter region |                                         | ChIP-PCR    |
| Forward               | tctccagctcctcctctct                     |             |
| Reverse               | ggccagagggttctttagg                     |             |
| S100P TSS region      |                                         | ChIP-PCR    |
| Forward               | ccagaaacgtcatcacaacg                    |             |
| Reverse               | gccgagaaaatgtcccact                     |             |

Table SII. Differentially expressed genes in RNA-seq data.

| Gene                | AGS_con | AGS_HOXC10 | HOXC10/con |
|---------------------|---------|------------|------------|
| <i>HOXC10</i>       | 0.080   | 3.293      | 3.213      |
| <i>PSG5</i>         | 2.163   | 4.549      | 2.387      |
| <i>PSG4</i>         | 3.571   | 5.863      | 2.292      |
| <i>TMEM52B</i>      | 2.319   | 4.306      | 1.987      |
| <i>OLR1</i>         | 4.549   | 6.501      | 1.953      |
| <i>UGT1A6</i>       | 3.120   | 4.996      | 1.876      |
| <i>SAMD4A</i>       | 3.665   | 5.516      | 1.851      |
| <i>FPR3</i>         | 5.322   | 7.073      | 1.751      |
| <i>NTM</i>          | 1.019   | 2.683      | 1.665      |
| <i>ANKRD1</i>       | 5.556   | 7.201      | 1.645      |
| <i>PSG11</i>        | 3.592   | 5.218      | 1.626      |
| <i>TRIM38</i>       | 1.636   | 3.223      | 1.587      |
| <i>IGFL2</i>        | 4.345   | 5.899      | 1.554      |
| <i>PRR9</i>         | 2.008   | 3.529      | 1.521      |
| <i>LINC01605</i>    | 1.636   | 3.151      | 1.514      |
| <i>MYL7</i>         | 2.460   | 3.967      | 1.506      |
| <i>NPPB</i>         | 2.028   | 3.477      | 1.449      |
| <i>FSCN1</i>        | 3.229   | 4.647      | 1.417      |
| <i>CST1</i>         | 7.765   | 9.132      | 1.367      |
| <i>HPGD</i>         | 5.654   | 7.010      | 1.356      |
| <i>PSG7</i>         | 1.555   | 2.897      | 1.342      |
| <i>PSG2</i>         | 3.395   | 4.732      | 1.338      |
| <i>RAC2</i>         | 0.156   | 1.481      | 1.325      |
| <i>WNT6</i>         | 1.059   | 2.363      | 1.304      |
| <i>TRIB3</i>        | 1.019   | 2.259      | 1.240      |
| <i>KLK8</i>         | 1.663   | 2.846      | 1.184      |
| <i>SPTLC3</i>       | 1.583   | 2.751      | 1.168      |
| <i>LINC01356</i>    | 2.399   | 3.554      | 1.155      |
| <i>GLDC</i>         | 0.542   | 1.678      | 1.136      |
| <i>FLVCR2</i>       | 1.945   | 3.065      | 1.120      |
| <i>GABRA3</i>       | 0.000   | 1.088      | 1.088      |
| <i>C20orf24</i>     | 2.884   | 3.967      | 1.082      |
| <i>PADI1</i>        | 2.656   | 3.731      | 1.076      |
| <i>TRABD2B</i>      | 3.092   | 4.161      | 1.069      |
| <i>CYR61</i>        | 5.199   | 6.266      | 1.066      |
| <i>FLJ22447</i>     | 0.296   | 1.342      | 1.046      |
| <i>ZG16B</i>        | 1.408   | 2.447      | 1.039      |
| <i>RPS17</i>        | 4.084   | 5.101      | 1.016      |
| <i>PSG6</i>         | 2.048   | 3.056      | 1.008      |
| <i>TMEM156</i>      | 0.846   | 1.852      | 1.005      |
| <i>MTRNR2L2</i>     | 0.156   | 1.156      | 1.000      |
| <i>SLC1A3</i>       | 4.940   | 5.931      | 0.991      |
| <i>PSTPIP2</i>      | 4.667   | 5.655      | 0.988      |
| <i>MIR6723</i>      | 1.209   | 2.196      | 0.987      |
| <i>PHF11</i>        | 2.917   | 3.904      | 0.986      |
| <i>LOC100507002</i> | 1.787   | 2.773      | 0.986      |
| <i>LYPD6B</i>       | 4.236   | 5.216      | 0.980      |
| <i>CYSRT1</i>       | 1.739   | 2.717      | 0.979      |
| <i>RPS27L</i>       | 6.903   | 7.860      | 0.957      |
| <i>MATN2</i>        | 1.583   | 2.538      | 0.956      |
| <i>RPL23P8</i>      | 1.136   | 2.078      | 0.943      |
| <i>FAM200B</i>      | 3.212   | 4.152      | 0.941      |
| <i>SPTSSA</i>       | 5.071   | 6.007      | 0.936      |
| <i>MIR17HG</i>      | 2.399   | 3.330      | 0.931      |
| <i>RP2</i>          | 5.390   | 6.319      | 0.929      |
| <i>FIRRE</i>        | 1.438   | 2.363      | 0.925      |
| <i>SNHG6</i>        | 4.205   | 5.124      | 0.919      |
| <i>MXRA7</i>        | 0.484   | 1.399      | 0.915      |
| <i>GGH</i>          | 6.190   | 7.102      | 0.913      |

Table SII. Continued.

| Gene                | AGS_con | AGS_HOXC10 | HOXC10/con |
|---------------------|---------|------------|------------|
| <i>APCDD1L-AS1</i>  | 1.278   | 2.180      | 0.902      |
| <i>LOC645166</i>    | 1.714   | 2.613      | 0.899      |
| <i>LINC00648</i>    | 2.068   | 2.964      | 0.897      |
| <i>DDIT4</i>        | 2.769   | 3.663      | 0.894      |
| <i>SNTB1</i>        | 4.871   | 5.765      | 0.893      |
| <i>SNORD4A</i>      | 0.296   | 1.189      | 0.892      |
| <i>CTNNA1</i>       | 6.576   | 7.456      | 0.881      |
| <i>HSPB8</i>        | 4.583   | 5.464      | 0.881      |
| <i>JMJD7</i>        | 1.172   | 2.043      | 0.871      |
| <i>CITED2</i>       | 3.848   | 4.713      | 0.865      |
| <i>CYTH3</i>        | 5.974   | 6.833      | 0.859      |
| <i>CAMK1D</i>       | 0.597   | 1.454      | 0.857      |
| <i>RAD51C</i>       | 3.973   | 4.829      | 0.856      |
| <i>SI00A4</i>       | 4.020   | 4.875      | 0.855      |
| <i>PRICKLE2</i>     | 0.800   | 1.655      | 0.855      |
| <i>CTC-338M12.4</i> | 0.891   | 1.746      | 0.854      |
| <i>PFDN4</i>        | 5.704   | 6.557      | 0.853      |
| <i>IFT20</i>        | 3.212   | 4.063      | 0.851      |
| <i>SNORD74</i>      | 1.583   | 2.433      | 0.850      |
| <i>GABARAPL1</i>    | 4.103   | 4.953      | 0.850      |
| <i>DLEU1</i>        | 3.449   | 4.295      | 0.846      |
| <i>MIR22HG</i>      | 3.606   | 4.448      | 0.842      |
| <i>CST4</i>         | 2.642   | 3.483      | 0.841      |
| <i>CKS2</i>         | 7.312   | 8.148      | 0.836      |
| <i>FAM151A</i>      | 0.935   | 1.768      | 0.833      |
| <i>SNORD79</i>      | 0.935   | 1.768      | 0.833      |
| <i>KCNJ13</i>       | 0.484   | 1.313      | 0.828      |
| <i>LOC102723649</i> | 0.424   | 1.252      | 0.827      |
| <i>ALPK3</i>        | 0.296   | 1.122      | 0.826      |
| <i>TNFAIP2</i>      | 5.472   | 6.297      | 0.825      |
| <i>TLR4</i>         | 4.874   | 5.698      | 0.824      |
| <i>KIAA0101</i>     | 6.623   | 7.441      | 0.817      |
| <i>VGLL1</i>        | 1.811   | 2.625      | 0.814      |
| <i>RWDD3</i>        | 2.269   | 3.082      | 0.814      |
| <i>GSTO2</i>        | 4.141   | 4.951      | 0.810      |
| <i>HEPPL1</i>       | 0.752   | 1.558      | 0.806      |
| <i>SYDE1</i>        | 0.752   | 1.558      | 0.806      |
| <i>PALD1</i>        | 0.702   | 1.507      | 0.805      |
| <i>ATP5EP2</i>      | 0.542   | 1.342      | 0.800      |
| <i>HSF2BP</i>       | 2.068   | 2.867      | 0.799      |
| <i>ITGAE</i>        | 4.491   | 5.290      | 0.799      |
| <i>SULT1A2</i>      | 0.424   | 1.221      | 0.796      |
| <i>MYOT</i>         | 0.424   | 1.221      | 0.796      |
| <i>ZFAND2A</i>      | 2.234   | 3.029      | 0.795      |
| <i>CPA4</i>         | 1.059   | 1.852      | 0.793      |
| <i>SEPWI</i>        | 7.130   | 7.922      | 0.792      |
| <i>SNORA73B</i>     | 1.438   | 2.228      | 0.789      |
| <i>MIR1304</i>      | 0.935   | 1.724      | 0.788      |
| <i>SELENBP1</i>     | 0.891   | 1.678      | 0.787      |
| <i>COX16</i>        | 2.781   | 3.567      | 0.786      |
| <i>TGDS</i>         | 4.240   | 5.025      | 0.785      |
| <i>NTN4</i>         | 2.199   | 2.983      | 0.784      |
| <i>DLEU2</i>        | 2.862   | 3.645      | 0.783      |
| <i>CDKN3</i>        | 6.681   | 7.460      | 0.779      |
| <i>CRYZ</i>         | 6.622   | 7.401      | 0.778      |
| <i>FAM103A1</i>     | 1.811   | 2.588      | 0.778      |
| <i>ADAMTSL2</i>     | 1.098   | 1.872      | 0.775      |
| <i>C4BPB</i>        | 7.074   | 7.849      | 0.774      |
| <i>KRT7</i>         | 2.519   | 3.293      | 0.774      |

Table SII. Continued.

| Gene                | AGS_con | AGS_HOXC10 | HOXC10/con |
|---------------------|---------|------------|------------|
| <i>NEAT1</i>        | 6.964   | 7.734      | 0.770      |
| <i>RPL36A</i>       | 2.430   | 3.200      | 0.770      |
| <i>PPP1R2</i>       | 7.281   | 8.051      | 0.769      |
| <i>USMG5</i>        | 6.099   | 6.863      | 0.764      |
| <i>ZGLP1</i>        | 0.424   | 1.189      | 0.764      |
| <i>FAS</i>          | 3.185   | 3.948      | 0.763      |
| <i>ACTG2</i>        | 0.846   | 1.607      | 0.761      |
| <i>FRY</i>          | 0.362   | 1.122      | 0.760      |
| <i>PSG1</i>         | 2.828   | 3.585      | 0.757      |
| <i>COMMD6</i>       | 5.490   | 6.247      | 0.757      |
| <i>MAMDC4</i>       | 2.707   | 3.463      | 0.756      |
| <i>ST6GALNAC3</i>   | 3.999   | 4.755      | 0.755      |
| <i>ZNF192P1</i>     | 0.702   | 1.454      | 0.752      |
| <i>DKK1</i>         | 8.585   | 9.334      | 0.749      |
| <i>SNORD56</i>      | 0.651   | 1.399      | 0.748      |
| <i>SNHG20</i>       | 0.977   | 1.724      | 0.746      |
| <i>SEMA3C</i>       | 4.788   | 5.532      | 0.745      |
| <i>DUSP14</i>       | 4.880   | 5.622      | 0.742      |
| <i>DOK3</i>         | 1.209   | 1.951      | 0.742      |
| <i>YPEL5</i>        | 4.679   | 5.421      | 0.742      |
| <i>C8orf59</i>      | 5.787   | 6.527      | 0.740      |
| <i>TSPAN12</i>      | 2.756   | 3.496      | 0.740      |
| <i>SYT7</i>         | 3.229   | 3.967      | 0.737      |
| <i>ARL4D</i>        | 2.884   | 3.622      | 0.737      |
| <i>GATA6-AS1</i>    | 2.430   | 3.167      | 0.737      |
| <i>LOC100652768</i> | 0.846   | 1.583      | 0.736      |
| <i>PMAIP1</i>       | 3.203   | 3.938      | 0.735      |
| <i>ZNF846</i>       | 1.555   | 2.289      | 0.735      |
| <i>MORN4</i>        | 1.098   | 1.831      | 0.734      |
| <i>NDUFAF2</i>      | 4.607   | 5.340      | 0.733      |
| <i>HSPB11</i>       | 5.839   | 6.571      | 0.732      |
| <i>MYBL1</i>        | 2.234   | 2.964      | 0.730      |
| <i>SNORA70</i>      | 1.278   | 2.007      | 0.729      |
| <i>FGG</i>          | 3.710   | 4.438      | 0.728      |
| <i>SNORD5</i>       | 1.468   | 2.196      | 0.728      |
| <i>ANKRD23</i>      | 1.019   | 1.746      | 0.727      |
| <i>SELT</i>         | 7.166   | 7.892      | 0.726      |
| <i>HSD3B1</i>       | 0.702   | 1.427      | 0.725      |
| <i>PSTK</i>         | 1.902   | 2.625      | 0.723      |
| <i>JAKMIP2-AS1</i>  | 2.028   | 2.751      | 0.723      |
| <i>HOXB-AS3</i>     | 2.781   | 3.503      | 0.722      |
| <i>IMMP1L</i>       | 3.092   | 3.812      | 0.721      |
| <i>SI00P</i>        | 3.139   | 3.859      | 0.720      |
| <i>SDHAF4</i>       | 1.987   | 2.706      | 0.719      |
| <i>TRAPPC2B</i>     | 2.415   | 3.134      | 0.719      |
| <i>CLIC3</i>        | 3.777   | 4.495      | 0.717      |
| <i>TTC28-AS1</i>    | 2.862   | 3.579      | 0.717      |
| <i>TUBG2</i>        | 2.642   | 3.359      | 0.717      |
| <i>LOC101927768</i> | 1.136   | 1.852      | 0.716      |
| <i>TMEM14C</i>      | 6.591   | 7.306      | 0.715      |
| <i>TBX5</i>         | 3.072   | 3.786      | 0.714      |
| <i>AP1S3</i>        | 6.660   | 7.372      | 0.712      |
| <i>SNORA44</i>      | 0.846   | 1.558      | 0.712      |
| <i>KHDC1</i>        | 3.101   | 3.812      | 0.711      |
| <i>FRMD4B</i>       | 5.611   | 6.322      | 0.711      |
| <i>SNORD36A</i>     | 1.763   | 2.474      | 0.711      |
| <i>SPON1</i>        | 0.542   | 1.252      | 0.710      |
| <i>TPK1</i>         | 1.610   | 2.319      | 0.710      |
| <i>AP3S1</i>        | 5.962   | 6.668      | 0.706      |

Table SII. Continued.

| Gene               | AGS_con | AGS_HOXC10 | HOXC10/con |
|--------------------|---------|------------|------------|
| <i>TNFRSF25</i>    | 2.181   | 2.887      | 0.706      |
| <i>LINC00883</i>   | 1.344   | 2.043      | 0.699      |
| <i>LINC01234</i>   | 2.460   | 3.159      | 0.699      |
| <i>CGRRF1</i>      | 3.619   | 4.317      | 0.698      |
| <i>LGALS1</i>      | 8.384   | 9.082      | 0.697      |
| <i>MZT1</i>        | 5.419   | 6.116      | 0.697      |
| <i>LSM5</i>        | 5.967   | 6.664      | 0.697      |
| <i>SSSCA1</i>      | 4.169   | 4.865      | 0.696      |
| <i>PTGS2</i>       | 3.807   | 4.501      | 0.694      |
| <i>CRBN</i>        | 4.236   | 4.929      | 0.694      |
| <i>C2orf16</i>     | 0.651   | 1.342      | 0.691      |
| <i>DNAJC15</i>     | 5.533   | 6.225      | 0.691      |
| <i>ADK</i>         | 5.996   | 6.685      | 0.689      |
| <i>C9orf85</i>     | 3.120   | 3.807      | 0.687      |
| <i>MYEOV2</i>      | 5.713   | 6.400      | 0.687      |
| <i>HOXB7</i>       | 0.846   | 1.533      | 0.686      |
| <i>MOCS2</i>       | 4.610   | 5.295      | 0.685      |
| <i>LRRC75A-AS1</i> | 7.576   | 8.258      | 0.682      |
| <i>TPRKB</i>       | 5.184   | 5.864      | 0.681      |
| <i>ANAPC15</i>     | 2.816   | 3.496      | 0.680      |
| <i>SMIM8</i>       | 2.816   | 3.496      | 0.680      |
| <i>SNORD29</i>     | 1.172   | 1.852      | 0.679      |
| <i>MOSPD1</i>      | 4.020   | 4.699      | 0.679      |
| <i>POLR2J4</i>     | 1.468   | 2.147      | 0.678      |
| <i>ITGB3BP</i>     | 4.353   | 5.030      | 0.677      |
| <i>LCORL</i>       | 2.269   | 2.945      | 0.677      |
| <i>RPL22L1</i>     | 5.095   | 5.771      | 0.677      |
| <i>PLA2G2E</i>     | 1.438   | 2.113      | 0.675      |
| <i>ZNF519</i>      | 1.688   | 2.363      | 0.675      |
| <i>NDUFB3</i>      | 5.737   | 6.411      | 0.675      |
| <i>C12orf29</i>    | 4.491   | 5.166      | 0.675      |
| <i>IMMP2L</i>      | 1.902   | 2.576      | 0.675      |
| <i>NUDT2</i>       | 3.062   | 3.737      | 0.674      |
| <i>RABGGTB</i>     | 6.363   | 7.036      | 0.674      |
| <i>GULP1</i>       | 5.800   | 6.473      | 0.673      |
| <i>BTC</i>         | 1.555   | 2.228      | 0.673      |
| <i>DMRT1</i>       | 1.278   | 1.951      | 0.673      |
| <i>SNORD81</i>     | 0.935   | 1.607      | 0.672      |
| <i>TMEM147-AS1</i> | 1.763   | 2.433      | 0.670      |
| <i>MIR4426</i>     | 2.732   | 3.402      | 0.670      |
| <i>RPS12</i>       | 9.670   | 10.340     | 0.669      |
| <i>RPS27A</i>      | 8.643   | 9.312      | 0.669      |
| <i>TCEAL8</i>      | 4.927   | 5.595      | 0.668      |
| <i>RPS3A</i>       | 10.123  | 10.791     | 0.668      |
| <i>HOXB9</i>       | 4.888   | 5.555      | 0.666      |
| <i>RPL23AP7</i>    | 2.756   | 3.422      | 0.666      |
| <i>SRCIN1</i>      | 1.610   | 2.274      | 0.665      |
| <i>RPL37</i>       | 9.318   | 9.982      | 0.664      |
| <i>LVCAT8</i>      | 1.714   | 2.377      | 0.664      |
| <i>NRP2</i>        | 1.468   | 2.130      | 0.662      |
| <i>KLK6</i>        | 4.454   | 5.116      | 0.661      |
| <i>YAE1D1</i>      | 3.536   | 4.197      | 0.661      |
| <i>SEPT7P2</i>     | 2.769   | 3.429      | 0.661      |
| <i>CCDC141</i>     | 0.846   | 1.507      | 0.661      |
| <i>SI00A16</i>     | 7.180   | 7.840      | 0.660      |
| <i>ZNF273</i>      | 3.434   | 4.093      | 0.660      |
| <i>TYMSOS</i>      | 1.172   | 1.831      | 0.659      |
| <i>SNORD28</i>     | 1.312   | 1.970      | 0.658      |
| <i>LINC01089</i>   | 1.438   | 2.096      | 0.658      |

Table SII. Continued.

| Gene                | AGS_con | AGS_HOXC10 | HOXC10/con |
|---------------------|---------|------------|------------|
| <i>BMP2</i>         | 2.839   | 3.496      | 0.657      |
| <i>BMS1P20</i>      | 4.498   | 5.155      | 0.657      |
| <i>PDCD10</i>       | 6.064   | 6.720      | 0.656      |
| <i>RPS10</i>        | 3.371   | 4.027      | 0.655      |
| <i>SNORD54</i>      | 0.362   | 1.017      | 0.655      |
| <i>MTSS1</i>        | 0.597   | 1.252      | 0.654      |
| <i>KRBOX4</i>       | 2.669   | 3.323      | 0.654      |
| <i>GCSH</i>         | 4.797   | 5.450      | 0.654      |
| <i>TRIM29</i>       | 0.977   | 1.631      | 0.654      |
| <i>SCEL</i>         | 3.703   | 4.357      | 0.654      |
| <i>SPACA6P-AS</i>   | 1.136   | 1.789      | 0.654      |
| <i>LOC101927482</i> | 1.408   | 2.061      | 0.653      |
| <i>COL4A2</i>       | 1.834   | 2.487      | 0.653      |
| <i>SNHG5</i>        | 4.751   | 5.404      | 0.653      |
| <i>PIGL</i>         | 2.707   | 3.359      | 0.652      |
| <i>DHX40</i>        | 4.863   | 5.513      | 0.650      |
| <i>ARL3</i>         | 4.182   | 4.832      | 0.649      |
| <i>SNORD23</i>      | 1.376   | 2.025      | 0.649      |
| <i>MED7</i>         | 3.256   | 3.904      | 0.648      |
| <i>IQCG</i>         | 1.098   | 1.746      | 0.648      |
| <i>LOC100506688</i> | 1.098   | 1.746      | 0.648      |
| <i>CBWD3</i>        | 1.098   | 1.746      | 0.648      |
| <i>PKIB</i>         | 0.752   | 1.399      | 0.647      |
| <i>NDFIP2</i>       | 6.146   | 6.793      | 0.647      |
| <i>THAP9</i>        | 2.048   | 2.695      | 0.647      |
| <i>AP1S2</i>        | 2.669   | 3.315      | 0.647      |
| <i>SH3PXD2A-AS1</i> | 0.542   | 1.189      | 0.647      |
| <i>SKAP1</i>        | 0.542   | 1.189      | 0.647      |
| <i>PDE8B</i>        | 0.542   | 1.189      | 0.647      |
| <i>STK17B</i>       | 4.846   | 5.492      | 0.646      |
| <i>TMSB4X</i>       | 9.362   | 10.007     | 0.645      |
| <i>CCDC136</i>      | 1.468   | 2.113      | 0.645      |
| <i>CMC2</i>         | 4.424   | 5.068      | 0.644      |
| <i>PCNA</i>         | 8.134   | 8.778      | 0.644      |
| <i>RPS20</i>        | 9.377   | 10.020     | 0.643      |
| <i>LOC102724312</i> | 1.209   | 1.852      | 0.643      |
| <i>CALM2</i>        | 9.468   | 10.111     | 0.643      |
| <i>RPL26</i>        | 9.582   | 10.225     | 0.643      |
| <i>FAM122C</i>      | 1.059   | 1.701      | 0.642      |
| <i>CRADD</i>        | 2.533   | 3.175      | 0.642      |
| <i>TM2D1</i>        | 4.393   | 5.035      | 0.642      |
| <i>NDUFC2</i>       | 3.203   | 3.843      | 0.641      |
| <i>SNORA61</i>      | 1.923   | 2.564      | 0.640      |
| <i>SNORA45B</i>     | 0.702   | 1.342      | 0.640      |
| <i>TMEM14A</i>      | 5.066   | 5.705      | 0.639      |
| <i>RCHY1</i>        | 4.959   | 5.596      | 0.638      |
| <i>RNASEH2B</i>     | 4.785   | 5.421      | 0.637      |
| <i>ATP6V1G1</i>     | 6.302   | 6.939      | 0.636      |
| <i>HES4</i>         | 2.319   | 2.955      | 0.636      |
| <i>HNRNPU-AS1</i>   | 2.694   | 3.330      | 0.636      |
| <i>POLR3F</i>       | 4.776   | 5.411      | 0.635      |
| <i>DUT</i>          | 5.767   | 6.402      | 0.635      |
| <i>KLHL5</i>        | 6.966   | 7.600      | 0.634      |
| <i>SNORA51</i>      | 0.846   | 1.481      | 0.634      |
| <i>CEP76</i>        | 4.708   | 5.342      | 0.634      |
| <i>NDUFB9</i>       | 6.485   | 7.117      | 0.632      |
| <i>LAMTOR3</i>      | 5.241   | 5.873      | 0.632      |
| <i>GNRH1</i>        | 0.651   | 1.283      | 0.632      |
| <i>ARHGAP33</i>     | 2.519   | 3.151      | 0.632      |

Table SII. Continued.

| Gene             | AGS_con | AGS_HOXC10 | HOXC10/con |
|------------------|---------|------------|------------|
| <i>YAF2</i>      | 3.747   | 4.379      | 0.632      |
| <i>GINS2</i>     | 4.785   | 5.416      | 0.632      |
| <i>DUSP22</i>    | 3.331   | 3.962      | 0.631      |
| <i>C19orf25</i>  | 4.245   | 4.875      | 0.631      |
| <i>C1D</i>       | 4.951   | 5.581      | 0.630      |
| <i>VAMP1</i>     | 2.217   | 2.846      | 0.630      |
| <i>STAG3L4</i>   | 2.828   | 3.456      | 0.629      |
| <i>GSKIP</i>     | 6.005   | 6.634      | 0.629      |
| <i>KRT17</i>     | 4.308   | 4.937      | 0.629      |
| <i>LINC01572</i> | 0.424   | 1.053      | 0.628      |
| <i>GOLT1B</i>    | 5.243   | 5.871      | 0.627      |
| <i>SNORA40</i>   | 3.395   | 4.022      | 0.627      |
| <i>PPIL3</i>     | 4.300   | 4.927      | 0.627      |
| <i>PCBD2</i>     | 3.500   | 4.127      | 0.627      |
| <i>MICALL2</i>   | 3.716   | 4.343      | 0.627      |
| <i>IDII</i>      | 5.653   | 6.279      | 0.626      |
| <i>LOC728730</i> | 1.344   | 1.970      | 0.625      |
| <i>TGM1</i>      | 2.252   | 2.877      | 0.625      |
| <i>TSPAN2</i>    | 0.935   | 1.558      | 0.623      |
| <i>RFESD</i>     | 0.935   | 1.558      | 0.623      |
| <i>INSIG1</i>    | 4.924   | 5.547      | 0.623      |
| <i>HPN</i>       | 1.438   | 2.061      | 0.623      |
| <i>CREBRF</i>    | 1.636   | 2.259      | 0.622      |
| <i>NPC2</i>      | 6.971   | 7.594      | 0.622      |
| <i>KCTD6</i>     | 3.522   | 4.144      | 0.622      |
| <i>DPH3</i>      | 4.964   | 5.586      | 0.622      |
| <i>KRT10</i>     | 4.249   | 4.870      | 0.621      |
| <i>DYNLL1</i>    | 8.311   | 8.932      | 0.621      |
| <i>RPL38</i>     | 8.279   | 8.900      | 0.621      |
| <i>SNHG7</i>     | 4.717   | 5.338      | 0.621      |
| <i>METTL2</i>    | 1.527   | 2.147      | 0.620      |
| <i>TRIQQ</i>     | 2.547   | 3.167      | 0.620      |
| <i>CLDN9</i>     | 1.059   | 1.678      | 0.619      |
| <i>LINC00493</i> | 4.932   | 5.551      | 0.619      |
| <i>FAM46B</i>    | 2.928   | 3.548      | 0.619      |
| <i>NUP37</i>     | 5.744   | 6.364      | 0.619      |
| <i>LAMTOR5</i>   | 5.916   | 6.535      | 0.619      |
| <i>LINC01004</i> | 0.891   | 1.507      | 0.615      |
| <i>MAD2L1</i>    | 6.834   | 7.449      | 0.615      |
| <i>ZNF433</i>    | 1.498   | 2.113      | 0.615      |
| <i>SEC22A</i>    | 3.703   | 4.317      | 0.614      |
| <i>SNX3</i>      | 6.719   | 7.332      | 0.613      |
| <i>PLGRKT</i>    | 3.194   | 3.807      | 0.613      |
| <i>SLC31A2</i>   | 2.732   | 3.345      | 0.613      |
| <i>GOLGA7</i>    | 5.083   | 5.695      | 0.612      |
| <i>TEX30</i>     | 3.022   | 3.633      | 0.611      |
| <i>TPT1</i>      | 11.091  | 11.702     | 0.611      |
| <i>SNORD99</i>   | 0.702   | 1.313      | 0.610      |
| <i>LINC00239</i> | 0.702   | 1.313      | 0.610      |
| <i>CAPZA2</i>    | 7.136   | 7.746      | 0.610      |
| <i>TMEM68</i>    | 3.999   | 4.608      | 0.609      |
| <i>FGD3</i>      | 2.269   | 2.877      | 0.608      |
| <i>NDUFA4</i>    | 7.427   | 8.035      | 0.608      |
| <i>PXN-AS1</i>   | 0.846   | 1.454      | 0.608      |
| <i>UBE2V1</i>    | 0.846   | 1.454      | 0.608      |
| <i>ANXA3</i>     | 8.230   | 8.837      | 0.608      |
| <i>SI00A14</i>   | 6.745   | 7.352      | 0.607      |
| <i>CCNB1IP1</i>  | 5.908   | 6.515      | 0.607      |
| <i>ACOT13</i>    | 4.593   | 5.200      | 0.607      |

Table SII. Continued.

| Gene             | AGS_con | AGS_HOXC10 | HOXC10/con |
|------------------|---------|------------|------------|
| <i>MRPL45P2</i>  | 1.945   | 2.551      | 0.606      |
| <i>RPS21</i>     | 8.903   | 9.509      | 0.606      |
| <i>UPP1</i>      | 3.323   | 3.928      | 0.606      |
| <i>OST4</i>      | 5.949   | 6.554      | 0.605      |
| <i>ZFAS1</i>     | 6.640   | 7.245      | 0.605      |
| <i>F3</i>        | 4.948   | 5.553      | 0.605      |
| <i>CCDC88B</i>   | 1.098   | 1.701      | 0.603      |
| <i>TSSK4</i>     | 1.098   | 1.701      | 0.603      |
| <i>OSTC</i>      | 6.707   | 7.310      | 0.603      |
| <i>TOMM5</i>     | 6.325   | 6.928      | 0.603      |
| <i>ZBTB80S</i>   | 4.607   | 5.208      | 0.601      |
| <i>TMEM38B</i>   | 3.957   | 4.559      | 0.601      |
| <i>LOC730101</i> | 3.062   | 3.663      | 0.601      |
| <i>IFITM2</i>    | 2.589   | 1.988      | -0.601     |
| <i>FAM160A1</i>  | 3.536   | 2.936      | -0.601     |
| <i>CRYBG3</i>    | 4.814   | 4.213      | -0.601     |
| <i>PFKFB3</i>    | 7.042   | 6.440      | -0.602     |
| <i>CPLX1</i>     | 3.062   | 2.460      | -0.602     |
| <i>BTBD9</i>     | 4.004   | 3.402      | -0.603     |
| <i>APOL6</i>     | 1.583   | 0.980      | -0.603     |
| <i>GP6</i>       | 2.234   | 1.631      | -0.603     |
| <i>PARP1</i>     | 8.931   | 8.328      | -0.603     |
| <i>SPP1</i>      | 1.857   | 1.252      | -0.605     |
| <i>HEATR1</i>    | 7.614   | 7.009      | -0.606     |
| <i>TRIM2</i>     | 4.637   | 4.031      | -0.606     |
| <i>PLAUR</i>     | 5.023   | 4.417      | -0.606     |
| <i>MAN2B1</i>    | 6.012   | 5.406      | -0.607     |
| <i>DNM1</i>      | 2.669   | 2.061      | -0.608     |
| <i>GPD1</i>      | 2.008   | 1.399      | -0.608     |
| <i>TLR3</i>      | 2.008   | 1.399      | -0.608     |
| <i>DNAH10</i>    | 1.663   | 1.053      | -0.610     |
| <i>OLFM1</i>     | 1.663   | 1.053      | -0.610     |
| <i>SEMA4B</i>    | 4.894   | 4.283      | -0.610     |
| <i>ARID4B</i>    | 6.375   | 5.763      | -0.612     |
| <i>DAAM2</i>     | 1.209   | 0.596      | -0.612     |
| <i>ATP6V0E2</i>  | 1.209   | 0.596      | -0.612     |
| <i>RAB3GAP2</i>  | 6.919   | 6.306      | -0.613     |
| <i>TNFRSF1B</i>  | 6.169   | 5.555      | -0.615     |
| <i>OSBPL5</i>    | 2.694   | 2.078      | -0.616     |
| <i>MAP1A</i>     | 2.384   | 1.768      | -0.616     |
| <i>OPALIN</i>    | 1.059   | 0.442      | -0.617     |
| <i>CPT1A</i>     | 6.691   | 6.074      | -0.617     |
| <i>IPO9</i>      | 8.334   | 7.716      | -0.617     |
| <i>CLMN</i>      | 5.235   | 4.617      | -0.618     |
| <i>GANAB</i>     | 9.046   | 8.428      | -0.618     |
| <i>MUC13</i>     | 5.715   | 5.096      | -0.619     |
| <i>GATA5</i>     | 3.753   | 3.134      | -0.619     |
| <i>DEF6</i>      | 2.430   | 1.810      | -0.620     |
| <i>MTR</i>       | 6.166   | 5.545      | -0.621     |
| <i>CABP1</i>     | 1.312   | 0.691      | -0.621     |
| <i>PPP1R3F</i>   | 1.312   | 0.691      | -0.621     |
| <i>CCDC88A</i>   | 5.709   | 5.088      | -0.621     |
| <i>RAPGEF5</i>   | 3.830   | 3.208      | -0.623     |
| <i>GAS7</i>      | 1.527   | 0.903      | -0.624     |
| <i>NFIA</i>      | 4.683   | 4.058      | -0.625     |
| <i>IRX5</i>      | 1.172   | 0.546      | -0.626     |
| <i>SIGLEC12</i>  | 1.172   | 0.546      | -0.626     |
| <i>RNF213</i>    | 6.124   | 5.497      | -0.627     |
| <i>BCL9</i>      | 4.751   | 4.123      | -0.628     |

Table SII. Continued.

| Gene                | AGS_con | AGS_HOXC10 | HOXC10/con |
|---------------------|---------|------------|------------|
| <i>APLP1</i>        | 2.707   | 2.078      | -0.628     |
| <i>ORAI2</i>        | 3.789   | 3.159      | -0.630     |
| <i>TRIM14</i>       | 4.699   | 4.067      | -0.632     |
| <i>B3GAT1</i>       | 1.019   | 0.386      | -0.632     |
| <i>LHX1</i>         | 1.019   | 0.386      | -0.632     |
| <i>FKBP9P1</i>      | 1.019   | 0.386      | -0.632     |
| <i>VILL</i>         | 2.694   | 2.061      | -0.633     |
| <i>LENG9</i>        | 2.781   | 2.147      | -0.634     |
| <i>SPDEF</i>        | 1.278   | 0.644      | -0.634     |
| <i>JUNB</i>         | 5.800   | 5.166      | -0.634     |
| <i>THRA</i>         | 5.031   | 4.396      | -0.635     |
| <i>LOC100130992</i> | 1.688   | 1.053      | -0.636     |
| <i>LIPH</i>         | 4.916   | 4.279      | -0.636     |
| <i>DIRAS2</i>       | 1.136   | 0.495      | -0.641     |
| <i>HEY1</i>         | 1.376   | 0.736      | -0.641     |
| <i>GNAO1</i>        | 1.583   | 0.942      | -0.641     |
| <i>CPE</i>          | 2.199   | 1.558      | -0.641     |
| <i>SLCO2B1</i>      | 3.842   | 3.200      | -0.642     |
| <i>MGAT3</i>        | 3.426   | 2.783      | -0.643     |
| <i>RAPGEFL1</i>     | 3.256   | 2.613      | -0.643     |
| <i>ST3GAL5</i>      | 2.669   | 2.025      | -0.644     |
| <i>RASGEF1B</i>     | 3.550   | 2.907      | -0.644     |
| <i>DNAJC22</i>      | 5.908   | 5.263      | -0.645     |
| <i>ADORA1</i>       | 3.022   | 2.377      | -0.645     |
| <i>LURAP1L</i>      | 4.337   | 3.692      | -0.645     |
| <i>TLN2</i>         | 6.490   | 5.844      | -0.646     |
| <i>AKNA</i>         | 3.363   | 2.717      | -0.646     |
| <i>SETSIP</i>       | 1.663   | 1.017      | -0.646     |
| <i>MYH14</i>        | 7.946   | 7.300      | -0.646     |
| <i>MSLN</i>         | 5.376   | 4.730      | -0.646     |
| <i>IQCE</i>         | 5.702   | 5.055      | -0.648     |
| <i>LPGAT1</i>       | 6.651   | 6.001      | -0.651     |
| <i>LY6D</i>         | 1.555   | 0.903      | -0.652     |
| <i>GCNT3</i>        | 4.169   | 3.516      | -0.653     |
| <i>RASSF2</i>       | 1.344   | 0.691      | -0.654     |
| <i>NCDN</i>         | 4.607   | 3.952      | -0.655     |
| <i>ATP1A3</i>       | 1.811   | 1.156      | -0.655     |
| <i>APOE</i>         | 2.163   | 1.507      | -0.656     |
| <i>SIPR3</i>        | 4.569   | 3.914      | -0.656     |
| <i>ADAMTS6</i>      | 1.098   | 0.442      | -0.656     |
| <i>EDIL3</i>        | 1.098   | 0.442      | -0.656     |
| <i>ERMN</i>         | 1.438   | 0.779      | -0.659     |
| <i>EPB41L2</i>      | 7.625   | 6.966      | -0.659     |
| <i>RSG1</i>         | 1.945   | 1.283      | -0.662     |
| <i>RNASE4</i>       | 1.527   | 0.863      | -0.664     |
| <i>MLXIPL</i>       | 1.527   | 0.863      | -0.664     |
| <i>GPM6B</i>        | 2.319   | 1.655      | -0.664     |
| <i>GGT1</i>         | 1.787   | 1.122      | -0.665     |
| <i>IGF2R</i>        | 6.803   | 6.137      | -0.666     |
| <i>ITGA2</i>        | 8.028   | 7.361      | -0.666     |
| <i>JHDM1D-AS1</i>   | 3.072   | 2.405      | -0.667     |
| <i>SHANK3</i>       | 2.781   | 2.113      | -0.668     |
| <i>ADSSL1</i>       | 1.610   | 0.942      | -0.668     |
| <i>RFLL</i>         | 2.252   | 1.583      | -0.669     |
| <i>CDC42BPA</i>     | 7.773   | 7.103      | -0.669     |
| <i>VSNL1</i>        | 4.583   | 3.914      | -0.670     |
| <i>RAB11FIP1</i>    | 6.992   | 6.322      | -0.670     |
| <i>NRXN2</i>        | 1.059   | 0.386      | -0.672     |
| <i>OAS3</i>         | 7.163   | 6.489      | -0.674     |

Table SII. Continued.

| Gene                | AGS_con | AGS_HOXC10 | HOXC10/con |
|---------------------|---------|------------|------------|
| <i>MAP3K5</i>       | 4.004   | 3.330      | -0.674     |
| <i>ARHGEF19</i>     | 1.987   | 1.313      | -0.674     |
| <i>OGDHL</i>        | 3.639   | 2.964      | -0.674     |
| <i>GJB2</i>         | 4.733   | 4.058      | -0.675     |
| <i>PCDHGB1</i>      | 1.498   | 0.822      | -0.676     |
| <i>HSPG2</i>        | 8.544   | 7.868      | -0.676     |
| <i>KCNJ10</i>       | 1.172   | 0.495      | -0.677     |
| <i>BCOR</i>         | 5.963   | 5.284      | -0.679     |
| <i>SAMD5</i>        | 7.289   | 6.609      | -0.680     |
| <i>EFR3B</i>        | 1.902   | 1.221      | -0.681     |
| <i>LRG1</i>         | 3.936   | 3.255      | -0.681     |
| <i>MICALCL</i>      | 2.971   | 2.289      | -0.681     |
| <i>IL17RA</i>       | 4.855   | 4.173      | -0.681     |
| <i>PLCE1</i>        | 3.881   | 3.200      | -0.682     |
| <i>NBPF8</i>        | 2.163   | 1.481      | -0.682     |
| <i>TAGLN3</i>       | 1.278   | 0.596      | -0.682     |
| <i>FRMD6</i>        | 3.331   | 2.649      | -0.682     |
| <i>DUSP2</i>        | 4.573   | 3.889      | -0.684     |
| <i>ITGB4</i>        | 7.058   | 6.374      | -0.684     |
| <i>CAMK2B</i>       | 1.376   | 0.691      | -0.686     |
| <i>QKI</i>          | 1.739   | 1.053      | -0.686     |
| <i>OLFM2</i>        | 2.269   | 1.583      | -0.686     |
| <i>DOCK11</i>       | 4.607   | 3.919      | -0.688     |
| <i>SHANK2</i>       | 3.418   | 2.729      | -0.690     |
| <i>LPAR1</i>        | 1.019   | 0.329      | -0.690     |
| <i>HSPA1A</i>       | 2.199   | 1.507      | -0.692     |
| <i>CPEB2</i>        | 2.547   | 1.852      | -0.695     |
| <i>FAM107A</i>      | 2.792   | 2.096      | -0.697     |
| <i>ATP2B2</i>       | 1.244   | 0.546      | -0.697     |
| <i>CRIP2</i>        | 3.898   | 3.200      | -0.698     |
| <i>PSD3</i>         | 6.113   | 5.414      | -0.699     |
| <i>FZD4</i>         | 2.896   | 2.196      | -0.700     |
| <i>MT1E</i>         | 1.344   | 0.644      | -0.700     |
| <i>CREB3L1</i>      | 2.490   | 1.789      | -0.701     |
| <i>BCAS1</i>        | 1.857   | 1.156      | -0.701     |
| <i>ZNF704</i>       | 4.773   | 4.071      | -0.701     |
| <i>CKMT1A</i>       | 2.234   | 1.533      | -0.702     |
| <i>GRAMD1B</i>      | 2.851   | 2.147      | -0.704     |
| <i>FOS</i>          | 5.876   | 5.172      | -0.704     |
| <i>GLG1</i>         | 7.460   | 6.754      | -0.706     |
| <i>SMAD1</i>        | 4.108   | 3.402      | -0.706     |
| <i>MTURN</i>        | 4.178   | 3.470      | -0.708     |
| <i>PDE11A</i>       | 1.688   | 0.980      | -0.709     |
| <i>SNCB</i>         | 1.688   | 0.980      | -0.709     |
| <i>LOC100129550</i> | 1.763   | 1.053      | -0.710     |
| <i>MMP15</i>        | 6.136   | 5.425      | -0.711     |
| <i>PBX1</i>         | 5.477   | 4.765      | -0.712     |
| <i>CHD3</i>         | 7.589   | 6.876      | -0.713     |
| <i>ANK3</i>         | 5.950   | 5.236      | -0.714     |
| <i>CORO2A</i>       | 5.587   | 4.873      | -0.715     |
| <i>KIAA0922</i>     | 3.807   | 3.091      | -0.716     |
| <i>SIRPA</i>        | 1.408   | 0.691      | -0.717     |
| <i>NUAK2</i>        | 4.736   | 4.018      | -0.718     |
| <i>VRTN</i>         | 2.302   | 1.583      | -0.720     |
| <i>TUBB4A</i>       | 2.399   | 1.678      | -0.721     |
| <i>INPP4B</i>       | 1.879   | 1.156      | -0.724     |
| <i>HHAT</i>         | 2.008   | 1.283      | -0.725     |
| <i>MAML2</i>        | 2.804   | 2.078      | -0.726     |
| <i>AKR1B10</i>      | 2.181   | 1.454      | -0.727     |

Table SII. Continued.

| Gene           | AGS_con | AGS_HOXC10 | HOXC10/con |
|----------------|---------|------------|------------|
| <i>SLC45A3</i> | 4.647   | 3.919      | -0.728     |
| <i>IQGAP1</i>  | 8.965   | 8.236      | -0.729     |
| <i>HPSE</i>    | 3.753   | 3.020      | -0.733     |
| <i>AATK</i>    | 1.555   | 0.822      | -0.733     |
| <i>HHLA2</i>   | 1.714   | 0.980      | -0.734     |
| <i>SLC43A2</i> | 6.301   | 5.566      | -0.736     |
| <i>TTBK2</i>   | 2.504   | 1.768      | -0.737     |
| <i>PLEKHB1</i> | 2.950   | 2.212      | -0.738     |
| <i>VTN</i>     | 8.499   | 7.759      | -0.740     |
| <i>LFNG</i>    | 4.990   | 4.249      | -0.741     |
| <i>MAP2</i>    | 2.732   | 1.988      | -0.744     |
| <i>ARFGEF3</i> | 3.968   | 3.223      | -0.745     |
| <i>ENO2</i>    | 1.966   | 1.221      | -0.746     |
| <i>SOX2-OT</i> | 1.438   | 0.691      | -0.748     |
| <i>PDZD4</i>   | 1.244   | 0.495      | -0.749     |
| <i>PADI2</i>   | 1.136   | 0.386      | -0.749     |
| <i>MOG</i>     | 1.136   | 0.386      | -0.749     |
| <i>MIAT</i>    | 1.019   | 0.269      | -0.750     |
| <i>SECTM1</i>  | 3.893   | 3.142      | -0.750     |
| <i>GALNT18</i> | 3.697   | 2.945      | -0.752     |
| <i>NAB2</i>    | 5.374   | 4.620      | -0.754     |
| <i>CENPF</i>   | 8.221   | 7.466      | -0.755     |
| <i>ERBB3</i>   | 6.792   | 6.037      | -0.755     |
| <i>HMG5</i>    | 2.781   | 2.025      | -0.755     |
| <i>CKMT1B</i>  | 2.319   | 1.558      | -0.761     |
| <i>CNTNAP1</i> | 2.319   | 1.558      | -0.761     |
| <i>APBB1</i>   | 1.498   | 0.736      | -0.762     |
| <i>FAM134B</i> | 3.783   | 3.020      | -0.763     |
| <i>SLPI</i>    | 4.266   | 3.503      | -0.763     |
| <i>FAT1</i>    | 8.530   | 7.766      | -0.764     |
| <i>KDM7A</i>   | 5.687   | 4.922      | -0.764     |
| <i>CHGA</i>    | 1.312   | 0.546      | -0.765     |
| <i>SLC17A7</i> | 2.048   | 1.283      | -0.765     |
| <i>ERAP1</i>   | 5.033   | 4.268      | -0.765     |
| <i>ZNF710</i>  | 4.573   | 3.807      | -0.766     |
| <i>GPM6A</i>   | 1.923   | 1.156      | -0.768     |
| <i>SIPAIL2</i> | 6.844   | 6.075      | -0.769     |
| <i>TUBA1A</i>  | 3.323   | 2.551      | -0.772     |
| <i>PTAFR</i>   | 3.893   | 3.117      | -0.776     |
| <i>EPAS1</i>   | 5.720   | 4.944      | -0.776     |
| <i>ACTL8</i>   | 2.384   | 1.607      | -0.776     |
| <i>ZNF516</i>  | 3.529   | 2.751      | -0.778     |
| <i>SRGAP3</i>  | 2.181   | 1.399      | -0.782     |
| <i>GDA</i>     | 6.673   | 5.889      | -0.784     |
| <i>THY1</i>    | 1.688   | 0.903      | -0.785     |
| <i>ATP2B4</i>  | 7.603   | 6.816      | -0.787     |
| <i>NREP</i>    | 2.756   | 1.970      | -0.787     |
| <i>SHH</i>     | 1.059   | 0.269      | -0.790     |
| <i>VDR</i>     | 2.971   | 2.180      | -0.791     |
| <i>CD44</i>    | 5.812   | 5.019      | -0.793     |
| <i>CEACAM1</i> | 4.860   | 4.067      | -0.793     |
| <i>CXorf57</i> | 1.438   | 0.644      | -0.794     |
| <i>ARAP3</i>   | 3.500   | 2.706      | -0.794     |
| <i>ZBED6</i>   | 5.016   | 4.221      | -0.794     |
| <i>NRGN</i>    | 3.158   | 2.363      | -0.794     |
| <i>SYT1</i>    | 1.987   | 1.189      | -0.798     |
| <i>TTC14</i>   | 3.925   | 3.125      | -0.800     |
| <i>MIA3</i>    | 7.060   | 6.252      | -0.808     |
| <i>FEZ1</i>    | 1.714   | 0.903      | -0.811     |



Table SII. Continued.

| Gene             | AGS_con | AGS_HOXC10 | HOXC10/con |
|------------------|---------|------------|------------|
| <i>ATP2A3</i>    | 3.203   | 2.391      | -0.811     |
| <i>SAMD11</i>    | 1.408   | 0.596      | -0.811     |
| <i>FOXA1</i>     | 5.997   | 5.184      | -0.813     |
| <i>ECE1</i>      | 7.375   | 6.560      | -0.816     |
| <i>PACSIN1</i>   | 1.312   | 0.495      | -0.816     |
| <i>CNTN2</i>     | 1.555   | 0.736      | -0.819     |
| <i>IKZF3</i>     | 2.732   | 1.912      | -0.820     |
| <i>TCAF1</i>     | 5.931   | 5.111      | -0.820     |
| <i>NCAM1</i>     | 1.763   | 0.942      | -0.821     |
| <i>ARSJ</i>      | 1.209   | 0.386      | -0.822     |
| <i>TMC5</i>      | 6.344   | 5.521      | -0.823     |
| <i>SUSD4</i>     | 3.626   | 2.794      | -0.832     |
| <i>GPR161</i>    | 6.442   | 5.610      | -0.832     |
| <i>ADGRA2</i>    | 3.092   | 2.259      | -0.833     |
| <i>CDK18</i>     | 4.025   | 3.192      | -0.833     |
| <i>LGI3</i>      | 1.278   | 0.442      | -0.836     |
| <i>SIX4</i>      | 2.656   | 1.810      | -0.845     |
| <i>NTN1</i>      | 4.852   | 4.004      | -0.848     |
| <i>UCHL1</i>     | 1.902   | 1.053      | -0.849     |
| <i>SNAP25</i>    | 3.139   | 2.289      | -0.850     |
| <i>PTP4A3</i>    | 2.681   | 1.831      | -0.850     |
| <i>PCDH7</i>     | 7.789   | 6.936      | -0.853     |
| <i>ATP7B</i>     | 3.478   | 2.625      | -0.854     |
| <i>EPHB2</i>     | 5.492   | 4.638      | -0.854     |
| <i>CEP170</i>    | 7.850   | 6.994      | -0.856     |
| <i>MAG</i>       | 1.636   | 0.779      | -0.857     |
| <i>CD82</i>      | 2.981   | 2.113      | -0.868     |
| <i>PIK3C2B</i>   | 6.891   | 6.021      | -0.869     |
| <i>GAP43</i>     | 1.312   | 0.442      | -0.870     |
| <i>MFSD6</i>     | 4.916   | 4.040      | -0.875     |
| <i>HCN2</i>      | 1.376   | 0.495      | -0.881     |
| <i>OAS2</i>      | 1.787   | 0.903      | -0.884     |
| <i>PELI2</i>     | 5.095   | 4.209      | -0.885     |
| <i>TRABD2A</i>   | 5.104   | 4.217      | -0.887     |
| <i>TNFRSF11A</i> | 3.652   | 2.762      | -0.890     |
| <i>NAT8L</i>     | 1.583   | 0.691      | -0.892     |
| <i>MRAP2</i>     | 1.945   | 1.053      | -0.892     |
| <i>CDKN1C</i>    | 2.504   | 1.607      | -0.897     |
| <i>SLC12A2</i>   | 9.952   | 9.044      | -0.908     |
| <i>TTYH1</i>     | 1.555   | 0.644      | -0.911     |
| <i>TPPP</i>      | 3.082   | 2.163      | -0.919     |
| <i>TNSI</i>      | 3.691   | 2.762      | -0.929     |
| <i>SLC1A4</i>    | 3.363   | 2.433      | -0.930     |
| <i>KDM5B</i>     | 7.403   | 6.470      | -0.933     |
| <i>OAS1</i>      | 5.544   | 4.611      | -0.933     |
| <i>TBC1D30</i>   | 4.462   | 3.522      | -0.939     |
| <i>DDX60</i>     | 4.779   | 3.838      | -0.940     |
| <i>CACNA1D</i>   | 3.363   | 2.419      | -0.944     |
| <i>PLCH1</i>     | 3.418   | 2.474      | -0.945     |
| <i>CDH12</i>     | 1.019   | 0.072      | -0.947     |
| <i>SLC9A2</i>    | 5.104   | 4.152      | -0.952     |
| <i>SNCAIP</i>    | 4.929   | 3.967      | -0.963     |
| <i>PCSK1N</i>    | 1.172   | 0.206      | -0.966     |
| <i>RRBP1</i>     | 8.926   | 7.958      | -0.968     |
| <i>SOX6</i>      | 1.468   | 0.495      | -0.973     |
| <i>ZNF467</i>    | 1.244   | 0.269      | -0.975     |
| <i>FBLN2</i>     | 2.851   | 1.872      | -0.978     |
| <i>CDH17</i>     | 8.435   | 7.452      | -0.983     |
| <i>KCNH3</i>     | 2.302   | 1.313      | -0.990     |

Table SII. Continued.

| Gene             | AGS_con | AGS_HOXC10 | HOXC10/con |
|------------------|---------|------------|------------|
| <i>EPHB6</i>     | 2.181   | 1.189      | -0.992     |
| <i>EGR1</i>      | 6.862   | 5.864      | -0.998     |
| <i>MBP</i>       | 6.247   | 5.248      | -0.999     |
| <i>RGS5</i>      | 3.659   | 2.649      | -1.010     |
| <i>ACOT1</i>     | 1.834   | 0.822      | -1.012     |
| <i>GFAP</i>      | 5.142   | 4.123      | -1.019     |
| <i>NT5C3B</i>    | 4.874   | 3.854      | -1.021     |
| <i>UST</i>       | 3.264   | 2.243      | -1.021     |
| <i>CPLX2</i>     | 2.399   | 1.371      | -1.028     |
| <i>PCDH1</i>     | 6.986   | 5.956      | -1.029     |
| <i>DOCK4</i>     | 2.873   | 1.831      | -1.042     |
| <i>ATP10D</i>    | 1.739   | 0.691      | -1.048     |
| <i>KIF1A</i>     | 2.816   | 1.768      | -1.048     |
| <i>CREB3L3</i>   | 2.302   | 1.252      | -1.051     |
| <i>UNC5B</i>     | 4.045   | 2.993      | -1.052     |
| <i>ABCC3</i>     | 5.156   | 4.102      | -1.054     |
| <i>C6orf222</i>  | 1.923   | 0.863      | -1.060     |
| <i>IRF8</i>      | 4.969   | 3.904      | -1.065     |
| <i>KCNK10</i>    | 1.344   | 0.269      | -1.076     |
| <i>MPP6</i>      | 1.583   | 0.495      | -1.088     |
| <i>PTGDS</i>     | 2.744   | 1.655      | -1.089     |
| <i>ALOX5</i>     | 2.907   | 1.810      | -1.096     |
| <i>FGB</i>       | 4.108   | 3.011      | -1.097     |
| <i>CEACAM6</i>   | 6.916   | 5.814      | -1.102     |
| <i>TMEM65</i>    | 3.578   | 2.474      | -1.105     |
| <i>ANXA10</i>    | 1.312   | 0.206      | -1.105     |
| <i>SLC34A2</i>   | 1.376   | 0.269      | -1.108     |
| <i>TBC1D9</i>    | 2.971   | 1.852      | -1.119     |
| <i>PPARGC1A</i>  | 2.756   | 1.631      | -1.125     |
| <i>GALC</i>      | 10.014  | 8.885      | -1.129     |
| <i>GSDMB</i>     | 3.002   | 1.872      | -1.130     |
| <i>F5</i>        | 7.034   | 5.898      | -1.135     |
| <i>AKAP5</i>     | 4.214   | 3.074      | -1.140     |
| <i>KCNE3</i>     | 5.038   | 3.894      | -1.144     |
| <i>EEF1A2</i>    | 2.008   | 0.863      | -1.145     |
| <i>RIN3</i>      | 3.571   | 2.419      | -1.152     |
| <i>NXPH4</i>     | 4.108   | 2.955      | -1.153     |
| <i>ACOT2</i>     | 3.130   | 1.970      | -1.160     |
| <i>GPX2</i>      | 5.523   | 4.357      | -1.166     |
| <i>SLC6A19</i>   | 1.902   | 0.736      | -1.166     |
| <i>DLX4</i>      | 1.923   | 0.736      | -1.188     |
| <i>NLRP7</i>     | 3.994   | 2.794      | -1.200     |
| <i>MPP5</i>      | 4.937   | 3.731      | -1.206     |
| <i>CEMIP</i>     | 3.550   | 2.334      | -1.216     |
| <i>TIMP2</i>     | 5.755   | 4.536      | -1.219     |
| <i>PLEKHA4</i>   | 4.624   | 3.402      | -1.222     |
| <i>RTN4RL2</i>   | 3.002   | 1.768      | -1.234     |
| <i>MUC1</i>      | 5.649   | 4.414      | -1.236     |
| <i>SLFN5</i>     | 2.960   | 1.724      | -1.237     |
| <i>PTPN13</i>    | 3.092   | 1.852      | -1.240     |
| <i>LRRC37A4P</i> | 2.144   | 0.903      | -1.241     |
| <i>PLP1</i>      | 4.676   | 3.416      | -1.261     |
| <i>TF</i>        | 2.384   | 1.122      | -1.261     |
| <i>GPHN</i>      | 2.445   | 1.156      | -1.289     |
| <i>CTSE</i>      | 10.080  | 8.780      | -1.299     |
| <i>DMBT1</i>     | 3.515   | 2.212      | -1.303     |
| <i>LGALS4</i>    | 5.003   | 3.680      | -1.323     |
| <i>HR</i>        | 4.953   | 3.628      | -1.326     |
| <i>SLC4A4</i>    | 3.120   | 1.789      | -1.331     |

Table SII. Continued.

| Gene           | AGS_con | AGS_HOXC10 | HOXC10/con |
|----------------|---------|------------|------------|
| <i>SLCO3A1</i> | 2.732   | 1.399      | -1.333     |
| <i>MECOM</i>   | 5.440   | 4.097      | -1.342     |
| <i>SLC29A4</i> | 1.987   | 0.644      | -1.343     |
| <i>CEACAM5</i> | 3.456   | 2.096      | -1.360     |
| <i>TBKBP1</i>  | 3.339   | 1.970      | -1.370     |
| <i>ESRRG</i>   | 2.217   | 0.822      | -1.395     |
| <i>TANC2</i>   | 4.377   | 2.926      | -1.451     |
| <i>HK1</i>     | 4.877   | 3.416      | -1.462     |
| <i>HAS3</i>    | 6.866   | 5.404      | -1.462     |
| <i>TP53I11</i> | 5.386   | 3.869      | -1.517     |
| <i>PRSS12</i>  | 6.145   | 4.626      | -1.519     |
| <i>SPINK1</i>  | 2.756   | 1.221      | -1.536     |
| <i>IGFBP2</i>  | 5.003   | 3.416      | -1.587     |
| <i>GALNT5</i>  | 4.132   | 2.538      | -1.593     |
| <i>APOL1</i>   | 6.095   | 4.501      | -1.594     |
| <i>PVRL3</i>   | 3.957   | 2.334      | -1.623     |
| <i>TMPRSS2</i> | 4.559   | 2.907      | -1.652     |
| <i>TOX3</i>    | 2.217   | 0.495      | -1.722     |
| <i>HEPH</i>    | 3.331   | 1.583      | -1.748     |
| <i>NEO1</i>    | 5.603   | 3.843      | -1.759     |
| <i>REG1A</i>   | 3.418   | 1.631      | -1.787     |
| <i>MIR6087</i> | 4.520   | 2.729      | -1.791     |
| <i>XYLT1</i>   | 3.331   | 1.507      | -1.824     |
| <i>LYZ</i>     | 10.456  | 8.596      | -1.860     |
| <i>MMP1</i>    | 5.213   | 3.278      | -1.935     |

*HOXC10*, homeodomain-containing gene 10.

Table SIII. Predicted target genes.

| PeakID         | Start     | End       | Strand | Peak score | Annotation                           | Distance to TSS | Gene name    |
|----------------|-----------|-----------|--------|------------|--------------------------------------|-----------------|--------------|
| Hoxc10-995087  | 64362709  | 64362717  | +      | 10.32      | Promoter-TSS (NM_021148)             | -907            | ZNF273       |
| Hoxc10-1149745 | 136217478 | 136217486 | +      | 10.32      | Promoter-TSS (NR_000016)             | 171             | SNORD36A     |
| Hoxc10-547950  | 189158494 | 189158502 | -      | 10.22      | Intron (NR_045563, intron 1 of 12)   | 1108            | GULP1        |
| Hoxc10-147415  | 13983571  | 13983579  | -      | 10.12      | Promoter-TSS (NM_006108)             | -609            | SPON1        |
| Hoxc10-1211085 | 130963123 | 130963131 | +      | 10.12      | Intron (NR_026975, intron 1 of 12)   | 1544            | FIRRE        |
| Hoxc10-738916  | 76434373  | 76434381  | +      | 10.12      | Intron (NM_001278537, intron 1 of 6) | 129             | RCHY1        |
| Hoxc10-946462  | 139694313 | 139694321 | +      | 10.12      | Exon (NM_006079, exon 2 of 2)        | 1033            | CITED2       |
| Hoxc10-325292  | 74958285  | 74958293  | -      | 10.02      | Intron (NM_006432, intron 1 of 4)    | 1795            | NPC2         |
| Hoxc10-817817  | 36607874  | 36607882  | -      | 10.02      | Intron (NM_001289940, intron 1 of 7) | 1421            | SLC1A3       |
| Hoxc10-238254  | 94074431  | 94074439  | -      | 10.02      | Intron (NM_001320100, intron 2 of 2) | 1890            | CRADD        |
| Hoxc10-542492  | 179913905 | 179913913 | +      | 9.65       | Intron (NM_173648, intron 1 of 23)   | 877             | CCDC141      |
| Hoxc10-475848  | 27801238  | 27801246  | +      | 9.55       | Exon (NM_032266, exon 1 of 1)        | 1853            | C2orf16      |
| Hoxc10-943556  | 133134784 | 133134792 | +      | 9.49       | Promoter-TSS (NM_001016)             | -920            | RPS12        |
| Hoxc10-406113  | 46667732  | 46667740  | -      | 9.45       | Promoter-TSS (NR_033202)             | -46             | HOXB-AS3     |
| Hoxc10-6424    | 28906351  | 28906359  | -      | 9.44       | Promoter-TSS (NR_002987)             | 50              | SNORA61      |
| Hoxc10-403356  | 35848243  | 35848251  | +      | 9.40       | Intergenic                           | -1704           | DUSP14       |
| Hoxc10-280816  | 78111544  | 78111552  | +      | 9.36       | Intron (NM_003843, intron 1 of 31)   | 1739            | SCEL         |
| Hoxc10-983361  | 32532447  | 32532455  | +      | 9.36       | Intron (NM_001130710, intron 1 of 4) | -1976           | LSM5         |
| Hoxc10-131746  | 106029462 | 106029470 | +      | 9.36       | Intron (NM_001191013, intron 1 of 5) | 835             | GSTO2        |
| Hoxc10-314211  | 48263561  | 48263569  | +      | 9.30       | Intron (NR_039996, intron 1 of 2)    | 652             | LINC00648    |
| Hoxc10-56754   | 173833431 | 173833439 | +      | 9.30       | Promoter-TSS (NR_003938)             | -80             | SNORD81      |
| Hoxc10-933551  | 114290525 | 114290533 | +      | 9.30       | Promoter-TSS (NR_125845)             | -336            | LOC101927768 |
| Hoxc10-263046  | 45914525  | 45914533  | +      | 9.30       | Promoter-TSS (NR_024458)             | 890             | TPT1         |
| Hoxc10-383836  | 61091233  | 61091241  | +      | 9.26       | Intergenic                           | -1567           | MIR4426      |
| Hoxc10-383835  | 61090812  | 61090820  | +      | 9.26       | Intergenic                           | -1146           | MIR4426      |
| Hoxc10-1000723 | 80550641  | 80550649  | +      | 9.26       | Intergenic                           | -1978           | SEMA3C       |
| Hoxc10-590663  | 60963985  | 60963993  | +      | 9.26       | TTS (NM_001024)                      | 1868            | RPS21        |
| Hoxc10-669647  | 122918853 | 122918861 | -      | 9.26       | Intergenic                           | -1917           | SEC22A       |
| Hoxc10-6423    | 28904929  | 28904937  | +      | 9.26       | TTS (NR_024127)                      | 401             | SNORD99      |
| Hoxc10-989689  | 48126200  | 48126208  | -      | 9.26       | Intergenic                           | -1996           | UPP1         |
| Hoxc10-938096  | 122929991 | 122929999 | +      | 9.26       | Intron (NM_001270393, intron 4 of 7) | -1382           | PKIB         |
| Hoxc10-552480  | 197038138 | 197038146 | -      | 9.24       | Intergenic                           | -1806           | STK17B       |
| Hoxc10-527635  | 149974612 | 149974620 | -      | 9.24       | Intergenic                           | -72             | LYPD6B       |
| Hoxc10-824228  | 52405254  | 52405262  | +      | 9.24       | Promoter-TSS (NM_001317002)          | 344             | MOCS2        |
| Hoxc10-263044  | 45913685  | 45913693  | +      | 9.24       | Promoter-TSS (NR_034107)             | 1730            | TPT1         |
| Hoxc10-1117770 | 34331273  | 34331281  | -      | 9.24       | Exon (NM_001286273, exon 3 of 5)     | 1773            | NUDT2        |
| Hoxc10-235374  | 88431138  | 88431146  | -      | 9.24       | Intron (NM_001244390, intron 1 of 2) | 1874            | C12orf29     |
| Hoxc10-881436  | 176938361 | 176938369 | +      | 9.02       | Intron (NM_001009894, intron 1 of 6) | -938            | DOK3         |
| Hoxc10-873333  | 156570203 | 156570211 | -      | 9.02       | Promoter-TSS (NM_001308235)          | -286            | MED7         |

Table SIII. Continued.

| PeakID         | Start     | End       | Strand | Peak score | Annotation                            | Distance to TSS | Gene name    |
|----------------|-----------|-----------|--------|------------|---------------------------------------|-----------------|--------------|
| Hoxc10-720650  | 39032250  | 39032258  | +      | 9.00       | Intron (NM_024943, intron 1 of 6)     | 1787            | TMEM156      |
| Hoxc10-835152  | 76504926  | 76504934  | -      | 9.00       | Intergenic                            | -1776           | PDE8B        |
| Hoxc10-762563  | 120986858 | 120986866 | -      | 9.00       | Exon (NM_002358, exon 2 of 5)         | 1151            | MAD2L1       |
| Hoxc10-912915  | 74020930  | 74020938  | +      | 9.00       | Promoter-TSS (NM_001251874)           | -846            | KHDC1        |
| Hoxc10-590662  | 60963553  | 60963561  | +      | 8.92       | TTS (NM_001024)                       | 1436            | RPS21        |
| Hoxc10-48204   | 151346745 | 151346753 | +      | 8.90       | Intergenic                            | -1539           | SELENBPI     |
| Hoxc10-300064  | 20800564  | 20800572  | -      | 8.90       | Intron (NM_021178, intron 1 of 6)     | 903             | CCNB1IP1     |
| Hoxc10-89355   | 1100813   | 1100821   | +      | 8.90       | Intron (NM_001317955, intron 1 of 5)  | 1839            | IDI1         |
| Hoxc10-1025091 | 129934216 | 129934224 | -      | 8.88       | Intron (NM_001163446, intron 1 of 9)  | 1246            | CPA4         |
| Hoxc10-156019  | 31529434  | 31529442  | -      | 8.83       | Intron (NM_144981, intron 1 of 6)     | 1737            | IMMP1L       |
| Hoxc10-893801  | 28128372  | 28128380  | +      | 8.73       | Intergenic                            | -1163           | ZNF192P1     |
| Hoxc10-17018   | 62191890  | 62191898  | -      | 8.72       | Promoter-TSS (NM_032027)              | -799            | TM2D1        |
| Hoxc10-406120  | 46688324  | 46688332  | -      | 8.72       | Promoter-TSS (NM_004502)              | 55              | HOXB7        |
| Hoxc10-616652  | 3222575   | 3222583   | -      | 8.67       | Intergenic                            | -1178           | CRBN         |
| Hoxc10-72137   | 207263107 | 207263115 | -      | 8.63       | Intron (NM_001017366, intron 2 of 6)  | 483             | C4BPB        |
| Hoxc10-720651  | 39032784  | 39032792  | -      | 8.63       | Intron (NM_024943, intron 1 of 6)     | 1253            | TMEM156      |
| Hoxc10-1000721 | 80549712  | 80549720  | +      | 8.63       | Intergenic                            | -1049           | SEMA3C       |
| Hoxc10-691630  | 170587901 | 170587909 | +      | 8.63       | Intron (NM_001099645, intron 1 of 3)  | 140             | RPL22L1      |
| Hoxc10-880109  | 172485094 | 172485102 | +      | 8.56       | Intron (NM_001168393, intron 1 of 3)  | 1743            | CREBRF       |
| Hoxc10-48851   | 153189402 | 153189410 | +      | 8.55       | Promoter-TSS (NM_001195571)           | -654            | PRR9         |
| Hoxc10-835154  | 76508489  | 76508497  | -      | 8.55       | Intron (NM_001029853, intron 1 of 20) | 1787            | PDE8B        |
| Hoxc10-1079736 | 98882211  | 98882219  | +      | 8.55       | Intron (NM_002380, intron 1 of 18)    | 966             | MATN2        |
| Hoxc10-621253  | 16305666  | 16305674  | +      | 8.55       | Promoter-TSS (NM_138381)              | 826             | DPH3         |
| Hoxc10-404645  | 40812902  | 40812910  | +      | 8.55       | Intron (NM_016437, intron 4 of 10)    | 1640            | TUBG2        |
| Hoxc10-945756  | 137988443 | 137988451 | -      | 8.55       | Intron (NR_125867, intron 1 of 3)     | 1664            | LOC102723649 |
| Hoxc10-920281  | 88033668  | 88033676  | -      | 8.53       | Intron (NM_198568, intron 1 of 2)     | 1366            | SMIM8        |
| Hoxc10-824227  | 52404716  | 52404724  | +      | 8.53       | Promoter-TSS (NR_034107)              | 882             | MOCS2        |
| Hoxc10-568532  | 233641947 | 233641955 | -      | 8.53       | Promoter-TSS (NM_001172417)           | -676            | KCNJ13       |
| Hoxc10-314212  | 48263871  | 48263879  | -      | 8.53       | Intron (NR_039996, intron 1 of 2)     | 342             | LINC00648    |
| Hoxc10-547947  | 189155030 | 189155038 | -      | 8.53       | Intergenic                            | -1362           | GULP1        |
| Hoxc10-483966  | 47406046  | 47406054  | -      | 8.53       | Intergenic                            | -1975           | CALM2        |
| Hoxc10-462084  | 46650991  | 46650999  | +      | 8.53       | Promoter-TSS (NM_001135113)           | -44             | IGFL2        |
| Hoxc10-215050  | 45272102  | 45272110  | +      | 8.53       | Intron (NM_001145110, intron 1 of 20) | -1473           | NELL2        |
| Hoxc10-738527  | 75721066  | 75721074  | +      | 8.52       | Intergenic                            | -1174           | BTC          |
| Hoxc10-179425  | 93754048  | 93754056  | +      | 8.52       | Promoter-TSS (NM_001098672)           | -326            | HEPPL1       |
| Hoxc10-1079737 | 98883011  | 98883019  | +      | 8.52       | Intron (NM_002380, intron 1 of 18)    | 1766            | MATN2        |
| Hoxc10-578548  | 18549811  | 18549819  | -      | 8.52       | Intron (NR_015432, intron 1 of 1)     | 1742            | LINC00493    |
| Hoxc10-403357  | 35851785  | 35851793  | +      | 8.48       | Intron (NM_007026, intron 1 of 2)     | 1838            | DUSP14       |
| Hoxc10-127138  | 92681462  | 92681470  | -      | 8.48       | Promoter-TSS (NM_014391)              | -434            | ANKRD1       |

Table SIII. Continued.

| PeakID         | Start     | End       | Strand | Peak score | Annotation                           | Distance to TSS | Gene name    |
|----------------|-----------|-----------|--------|------------|--------------------------------------|-----------------|--------------|
| Hoxc10-1035079 | 155091213 | 155091221 | -      | 8.47       | Intron (NM_198337, intron 2 of 3)    | 1735            | INSIG1       |
| Hoxc10-568531  | 233640714 | 233640722 | -      | 8.45       | Intron (NM_002242, intron 1 of 2)    | 557             | KCNJ13       |
| Hoxc10-751504  | 100814685 | 100814693 | +      | 8.45       | Intron (NR_024170, intron 1 of 5)    | 1014            | LAMTOR3      |
| Hoxc10-938036  | 122794426 | 122794434 | +      | 8.42       | Intron (NM_001270393, intron 1 of 7) | 1368            | PKIB         |
| Hoxc10-527600  | 149893872 | 149893880 | -      | 8.37       | Intergenic                           | -1105           | LYPD6B       |
| Hoxc10-314210  | 48262270  | 48262278  | -      | 8.36       | Intron (NR_039996, intron 1 of 2)    | 1943            | LINC00648    |
| Hoxc10-348328  | 48622396  | 48622404  | -      | 8.36       | Promoter-TSS (NM_001330286)          | -892            | DUT          |
| Hoxc10-1058488 | 56686606  | 56686614  | +      | 8.32       | Promoter-TSS (NM_001286661)          | -644            | TMEM68       |
| Hoxc10-406112  | 46667089  | 46667097  | +      | 8.32       | Promoter-TSS (NR_033202)             | -689            | HOXB-AS3     |
| Hoxc10-217970  | 54377088  | 54377096  | +      | 8.32       | TTS (NR_047506)                      | -1854           | HOXC10       |
| Hoxc10-554734  | 201753658 | 201753666 | -      | 8.30       | Promoter-TSS (NM_021824)             | 187             | PPIL3        |
| Hoxc10-199473  | 10367438  | 10367446  | -      | 8.30       | Intron (NM_031412, intron 1 of 3)    | 1953            | GABARAPL1    |
| Hoxc10-869595  | 146941084 | 146941092 | -      | 8.27       | Intron (NR_038902, intron 1 of 3)    | 1531            | JAKMIP2-AS1  |
| Hoxc10-264909  | 50072349  | 50072357  | +      | 8.27       | Intron (NM_001040444, intron 1 of 9) | 1161            | PHF11        |
| Hoxc10-264908  | 50072321  | 50072329  | +      | 8.27       | Intron (NM_001040444, intron 1 of 9) | 1133            | PHF11        |
| Hoxc10-612089  | 37640586  | 37640594  | -      | 8.27       | Promoter-TSS (NM_002872)             | -251            | RAC2         |
| Hoxc10-1211087 | 130965832 | 130965840 | +      | 8.26       | Intergenic                           | -1165           | FIRRE        |
| Hoxc10-912914  | 74020557  | 74020565  | +      | 8.26       | Promoter-TSS (NM_001251874)          | -473            | KHDC1        |
| Hoxc10-120111  | 75912806  | 75912814  | -      | 8.26       | Intron (NM_006721, intron 1 of 10)   | 1867            | ADK          |
| Hoxc10-738917  | 76435944  | 76435952  | +      | 8.26       | Intron (NM_001278538, intron 1 of 8) | -1442           | RCHY1        |
| Hoxc10-1133874 | 91924179  | 91924187  | -      | 8.22       | Intergenic                           | -1927           | CKS2         |
| Hoxc10-892908  | 25961535  | 25961543  | -      | 8.22       | Intergenic                           | -1378           | TRIM38       |
| Hoxc10-348327  | 48622152  | 48622160  | +      | 8.22       | Intergenic                           | -1136           | DUT          |
| Hoxc10-1024669 | 128430036 | 128430044 | +      | 8.22       | Intergenic                           | -1424           | CCDC136      |
| Hoxc10-48944   | 153590488 | 153590496 | -      | 8.22       | TTS (NM_005979)                      | -1684           | S100A14      |
| Hoxc10-1102869 | 5438164   | 5438172   | +      | 8.22       | Promoter-TSS (NM_018465)             | -231            | PLGRKT       |
| Hoxc10-404137  | 38977964  | 38977972  | +      | 8.17       | Intron (NM_000421, intron 1 of 7)    | 895             | KRT10        |
| Hoxc10-1145150 | 120468236 | 120468244 | +      | 8.17       | Intron (NM_138557, intron 1 of 1)    | 1787            | TLR4         |
| Hoxc10-6414    | 28834901  | 28834909  | +      | 8.17       | Promoter-TSS (NR_004404)             | -165            | SNORA73B     |
| Hoxc10-640669  | 64209851  | 64209859  | -      | 8.16       | Intron (NM_198859, intron 1 of 7)    | 1276            | PRICKLE2     |
| Hoxc10-280814  | 78110813  | 78110821  | -      | 8.16       | Intron (NM_003843, intron 1 of 31)   | 1008            | SCEL         |
| Hoxc10-423461  | 14133445  | 14133453  | -      | 8.16       | Promoter-TSS (NR_033354)             | -960            | ZNF519       |
| Hoxc10-738915  | 76434304  | 76434312  | -      | 8.16       | Intron (NM_001278537, intron 1 of 6) | 198             | RCHY1        |
| Hoxc10-986517  | 39605075  | 39605083  | -      | 8.16       | Promoter-TSS (NM_020192)             | -896            | YAE1D1       |
| Hoxc10-690025  | 167452071 | 167452079 | +      | 8.16       | 5'UTR (NM_007217, exon 2 of 9)       | 519             | PDCD10       |
| Hoxc10-1051524 | 37350288  | 37350296  | +      | 8.16       | Intron (NR_121620, intron 1 of 6)    | 1139            | LINC01605    |
| Hoxc10-1158264 | 15873262  | 15873270  | -      | 8.16       | Promoter-TSS (NM_003916)             | -129            | APIS2        |
| Hoxc10-552512  | 197125684 | 197125692 | -      | 8.14       | Intron (NR_110226, intron 2 of 2)    | 940             | LOC101927482 |
| Hoxc10-527619  | 149935167 | 149935175 | -      | 8.12       | Intron (NM_001317004, intron 1 of 6) | 1135            | LYPD6B       |

Table SIII. Continued.

| PeakID         | Start     | End       | Strand | Peak score | Annotation                            | Distance to TSS | Gene name  |
|----------------|-----------|-----------|--------|------------|---------------------------------------|-----------------|------------|
| Hoxc10-586731  | 48733209  | 48733217  | +      | 8.12       | Promoter-TSS (NM_001282575)           | -717            | UBE2V1     |
| Hoxc10-988779  | 45808437  | 45808445  | +      | 8.05       | Non-coding (NR_024271, exon 1 of 13)  | 176             | SEPT7P2    |
| Hoxc10-383834  | 61087890  | 61087898  | +      | 8.00       | Intergenic                            | 1776            | MIR4426    |
| Hoxc10-1061974 | 63953375  | 63953383  | +      | 8.00       | Intergenic                            | -1769           | GGH        |
| Hoxc10-238253  | 94069792  | 94069800  | +      | 8.00       | Intergenic                            | -1351           | CRADD      |
| Hoxc10-461293  | 43421384  | 43421392  | -      | 8.00       | Intron (NM_001031850, intron 1 of 5)  | 688             | PSG6       |
| Hoxc10-315233  | 50085862  | 50085870  | +      | 8.00       | Intron (NM_001001, intron 1 of 1)     | 1537            | RPL36AL    |
| Hoxc10-1061971 | 63950636  | 63950644  | -      | 8.00       | Intron (NM_003878, intron 1 of 8)     | 970             | GGH        |
| Hoxc10-1000720 | 80549486  | 80549494  | +      | 7.99       | Promoter-TSS (NM_006379)              | -823            | SEMA3C     |
| Hoxc10-475846  | 27798164  | 27798172  | +      | 7.90       | Intergenic                            | -1221           | C2orf16    |
| Hoxc10-24271   | 76541179  | 76541187  | +      | 7.90       | Intron (NM_152996, intron 1 of 4)     | 794             | ST6GALNAC3 |
| Hoxc10-1000722 | 80549930  | 80549938  | -      | 7.90       | Intergenic                            | -1267           | SEMA3C     |
| Hoxc10-475847  | 27800858  | 27800866  | -      | 7.90       | Exon (NM_032266, exon 1 of 1)         | 1473            | C2orf16    |
| Hoxc10-1063699 | 67524231  | 67524239  | -      | 7.90       | Intron (NM_001294282, intron 1 of 14) | 1249            | MYBL1      |
| Hoxc10-14129   | 55087645  | 55087653  | +      | 7.90       | Intron (NM_176782, intron 1 of 7)     | 1551            | FAM151A    |
| Hoxc10-983359  | 32530492  | 32530500  | -      | 7.90       | Promoter-TSS (NM_012322)              | -21             | LSM5       |
| Hoxc10-120123  | 75937582  | 75937590  | -      | 7.90       | Intron (NM_001123, intron 1 of 10)    | 1339            | ADK        |
| Hoxc10-1079738 | 98883041  | 98883049  | -      | 7.88       | Intron (NM_002380, intron 1 of 18)    | 1796            | MATN2      |
| Hoxc10-400446  | 26660996  | 26661004  | +      | 7.82       | Intron (NM_00126774, intron 1 of 5)   | 1515            | IFT20      |
| Hoxc10-1020688 | 120499699 | 120499707 | +      | 7.80       | Intergenic                            | -1526           | TSPAN12    |
| Hoxc10-289051  | 91998657  | 91998665  | +      | 7.80       | Intergenic                            | -1413           | MIR17HG    |
| Hoxc10-797320  | 185545439 | 185545447 | -      | 7.80       | Intron (NR_131965, intron 1 of 2)     | 583             | LVCAT8     |
| Hoxc10-280817  | 78111702  | 78111710  | -      | 7.80       | Intron (NM_003843, intron 1 of 31)    | 1897            | SCEL       |
| Hoxc10-280813  | 78110471  | 78110479  | -      | 7.80       | Intron (NM_003843, intron 1 of 31)    | 666             | SCEL       |
| Hoxc10-300065  | 20803285  | 20803293  | +      | 7.80       | Intergenic                            | -1818           | CCNB1IP1   |
| Hoxc10-780954  | 155533466 | 155533474 | -      | 7.80       | Intron (NM_021870, intron 2 of 8)     | 432             | FGG        |
| Hoxc10-395432  | 8288257   | 8288265   | -      | 7.80       | Intergenic                            | -1696           | RPL26      |
| Hoxc10-983357  | 32528157  | 32528165  | +      | 7.80       | Intron (NM_001139499, intron 3 of 4)  | 1862            | LSM5       |
| Hoxc10-198183  | 6864421   | 6864429   | -      | 7.80       | Intergenic                            | -1789           | MLF2       |
| Hoxc10-1018436 | 116501585 | 116501593 | -      | 7.80       | Promoter-TSS (NM_006136)              | -974            | CAPZA2     |
| Hoxc10-989690  | 48128551  | 48128559  | -      | 7.80       | Promoter-TSS (NM_003364)              | -182            | UPPI       |
| Hoxc10-970514  | 6313176   | 6313184   | -      | 7.78       | Promoter-TSS (NM_004227)              | -938            | CYTH3      |
| Hoxc10-23614   | 75199755  | 75199763  | +      | 7.78       | Promoter-TSS (NM_001130042)           | -667            | CRYZ       |
| Hoxc10-1100683 | 840995    | 841003    | +      | 7.76       | Promoter-TSS (NM_021951)              | -691            | DMRT1      |
| Hoxc10-213641  | 42634033  | 42634041  | +      | 7.76       | Intergenic                            | -1867           | YAF2       |
| Hoxc10-301402  | 24674260  | 24674268  | +      | 7.75       | Promoter-TSS (NM_001308067)           | -593            | TSSK4      |
| Hoxc10-1077701 | 93976979  | 93976987  | -      | 7.75       | Intron (NM_001171797, intron 1 of 4)  | 834             | TRIQK      |
| Hoxc10-265124  | 50657399  | 50657407  | -      | 7.73       | Intron (NR_109974, intron 2 of 6)     | 1098            | DLEU1      |
| Hoxc10-1012205 | 104631812 | 104631820 | +      | 7.70       | Promoter-TSS (NR_039981)              | -204            | LINC01004  |

Table SIII. Continued.

| PeakID         | Start     | End       | Strand | Peak score | Annotation                            | Distance to TSS | Gene name    |
|----------------|-----------|-----------|--------|------------|---------------------------------------|-----------------|--------------|
| Hoxc10-1030763 | 144534793 | 144534801 | +      | 7.70       | Intergenic                            | -1651           | TPK1         |
| Hoxc10-156020  | 31529892  | 31529900  | -      | 7.70       | Intron (NM_144981, intron 1 of 6)     | 1279            | IMMP1L       |
| Hoxc10-554733  | 201752820 | 201752828 | +      | 7.70       | Intron (NM_032472, intron 1 of 6)     | 1025            | PPIL3        |
| Hoxc10-933549  | 114289606 | 114289614 | +      | 7.70       | Intron (NR_033441, intron 1 of 14)    | -1255           | LOC101927768 |
| Hoxc10-423460  | 14132916  | 14132924  | +      | 7.70       | Promoter-TSS (NR_033354)              | -431            | ZNF519       |
| Hoxc10-404786  | 41475674  | 41475682  | -      | 7.70       | Promoter-TSS (NM_001661)              | -675            | ARL4D        |
| Hoxc10-720658  | 39045472  | 39045480  | -      | 7.70       | Promoter-TSS (NM_001171654)           | -975            | KLHL5        |
| Hoxc10-588044  | 52823435  | 52823443  | -      | 7.70       | Intergenic                            | -1063           | PFND4        |
| Hoxc10-547949  | 189157775 | 189157783 | -      | 7.69       | Non-coding (NR_045563, exon 1 of 13)  | 389             | GULP1        |
| Hoxc10-819816  | 40834805  | 40834813  | +      | 7.66       | Intron (NM_000997, intron 1 of 3)     | 578             | RPL37        |
| Hoxc10-48205   | 151346763 | 151346771 | +      | 7.63       | Intergenic                            | -1557           | SELENBP1     |
| Hoxc10-452204  | 1477521   | 1477529   | +      | 7.62       | Intron (NM_152482, intron 2 of 2)     | 1703            | C19orf25     |
| Hoxc10-946461  | 139693873 | 139693881 | +      | 7.62       | 3'UTR (NM_006079, exon 2 of 2)        | 1473            | CITED2       |
| Hoxc10-17017   | 62191490  | 62191498  | -      | 7.59       | Promoter-TSS (NM_032027)              | -399            | TM2D1        |
| Hoxc10-300063  | 20799761  | 20799769  | +      | 7.59       | Intron (NM_021178, intron 1 of 6)     | 1706            | CCNB1IP1     |
| Hoxc10-1158263 | 15871146  | 15871154  | -      | 7.59       | Intron (NM_001272071, intron 1 of 5)  | 1987            | API2         |
| Hoxc10-1197    | 6525992   | 6526000   | -      | 7.59       | TTS (NM_001265592)                    | 259             | TNFRSF25     |
| Hoxc10-395431  | 8287019   | 8287027   | -      | 7.59       | Promoter-TSS (NM_000987)              | -458            | RPL26        |
| Hoxc10-552479  | 197037176 | 197037184 | -      | 7.57       | Promoter-TSS (NM_004226)              | -844            | STK17B       |
| Hoxc10-23613   | 75199672  | 75199680  | -      | 7.56       | Promoter-TSS (NM_001130042)           | -584            | CRYZ         |
| Hoxc10-487932  | 55457452  | 55457460  | +      | 7.56       | Intron (NM_152385, intron 1 of 12)    | -1583           | RPS27A       |
| Hoxc10-404140  | 38979566  | 38979574  | +      | 7.56       | Promoter-TSS (NM_000421)              | -707            | KRT10        |
| Hoxc10-179424  | 93754015  | 93754023  | -      | 7.56       | Promoter-TSS (NM_001098672)           | -359            | HEPPL1       |
| Hoxc10-945755  | 137988332 | 137988340 | -      | 7.56       | Intron (NR_125867, intron 1 of 3)     | 1553            | LOC102723649 |
| Hoxc10-542494  | 179916245 | 179916253 | -      | 7.55       | Intergenic                            | -1463           | CCDC141      |
| Hoxc10-294339  | 103427273 | 103427281 | +      | 7.55       | Intergenic                            | -1106           | TEX30        |
| Hoxc10-638184  | 58485694  | 58485702  | -      | 7.55       | Intron (NM_153331, intron 1 of 1)     | 1606            | KCTD6        |
| Hoxc10-398325  | 16121478  | 16121486  | -      | 7.55       | Intron (NM_004278, intron 1 of 6)     | 973             | PIGL         |
| Hoxc10-306637  | 34930605  | 34930613  | +      | 7.53       | Intron (NM_138288, intron 1 of 1)     | 859             | SPTSSA       |
| Hoxc10-893802  | 28131105  | 28131113  | -      | 7.53       | Intron (NR_103448, intron 2 of 4)     | 1570            | ZNF192P1     |
| Hoxc10-608033  | 22654110  | 22654118  | -      | 7.53       | Intron (NR_027293, intron 1 of 10)    | 1651            | BMS1P20      |
| Hoxc10-404139  | 38979526  | 38979534  | -      | 7.53       | Promoter-TSS (NM_000421)              | -667            | KRT10        |
| Hoxc10-215049  | 45268369  | 45268377  | -      | 7.53       | Intron (NM_001145110, intron 3 of 20) | 1071            | NELL2        |
| Hoxc10-1015491 | 111201033 | 111201041 | -      | 7.52       | Intron (NM_001244606, intron 2 of 6)  | 1310            | IMMP2L       |
| Hoxc10-983358  | 32528180  | 32528188  | +      | 7.52       | Intron (NM_001139499, intron 3 of 4)  | 1839            | LSM5         |
| Hoxc10-264907  | 50071915  | 50071923  | -      | 7.50       | Intron (NM_001040444, intron 1 of 9)  | 727             | PHF11        |
| Hoxc10-248157  | 122239739 | 122239747 | +      | 7.50       | Intron (NR_002809, intron 2 of 6)     | 1647            | LINC01089    |
| Hoxc10-919482  | 86390176  | 86390184  | +      | 7.49       | Intergenic                            | -1729           | SNHG5        |
| Hoxc10-464540  | 57876505  | 57876513  | -      | 7.49       | Non-coding (NR_002166, exon 2 of 2)   | 1630            | TRAPPC2B     |

Table SIII. Continued.

| PeakID         | Start     | End       | Strand | Peak score | Annotation                           | Distance to TSS | Gene name    |
|----------------|-----------|-----------|--------|------------|--------------------------------------|-----------------|--------------|
| Hoxc10-1156960 | 12994793  | 12994801  | -      | 7.49       | Intron (NM_021109, intron 2 of 2)    | 1571            | TMSB4X       |
| Hoxc10-869594  | 146939752 | 146939760 | +      | 7.49       | Intron (NR_038902, intron 1 of 3)    | 199             | JAKMIP2-AS1  |
| Hoxc10-817814  | 36605597  | 36605605  | -      | 7.46       | Promoter-TSS (NM_004172)             | -856            | SLC1A3       |
| Hoxc10-556814  | 206546170 | 206546178 | -      | 7.46       | Intergenic                           | -1050           | NRP2         |
| Hoxc10-1102870 | 5439644   | 5439652   | -      | 7.45       | Intergenic                           | -1711           | PLGRKT       |
| Hoxc10-1156959 | 12992024  | 12992032  | +      | 7.45       | Intergenic                           | -1198           | TMSB4X       |
| Hoxc10-94014   | 12389656  | 12389664  | -      | 7.45       | Intergenic                           | -1882           | CAMK1D       |
| Hoxc10-552478  | 197034361 | 197034369 | +      | 7.45       | Intron (NM_004226, intron 1 of 7)    | 1971            | STK17B       |
| Hoxc10-920280  | 88033330  | 88033338  | -      | 7.45       | Intron (NM_198568, intron 1 of 2)    | 1028            | SMIM8        |
| Hoxc10-1018437 | 116501939 | 116501947 | -      | 7.45       | Promoter-TSS (NM_006136)             | -620            | CAPZA2       |
| Hoxc10-139491  | 124737621 | 124737629 | +      | 7.45       | Intergenic                           | -1931           | PSTK         |
| Hoxc10-588045  | 52823799  | 52823807  | +      | 7.45       | Promoter-TSS (NM_002623)             | -699            | PFDN4        |
| Hoxc10-873332  | 156568535 | 156568543 | -      | 7.45       | Intron (NM_004270, intron 1 of 1)    | 1247            | MED7         |
| Hoxc10-394408  | 3702996   | 3703004   | +      | 7.45       | Intron (NM_002208, intron 1 of 30)   | 1537            | ITGAE        |
| Hoxc10-198181  | 6860685   | 6860693   | +      | 7.45       | Intron (NM_005439, intron 4 of 8)    | 1393            | MLF2         |
| Hoxc10-1212305 | 133940925 | 133940933 | +      | 7.44       | Promoter-TSS (NM_001170782)          | -276            | FAM122C      |
| Hoxc10-542493  | 179914567 | 179914575 | -      | 7.44       | Exon (NM_001316745, exon 1 of 12)    | 215             | CCDC141      |
| Hoxc10-1172639 | 46695015  | 46695023  | -      | 7.44       | Intergenic                           | -1328           | RP2          |
| Hoxc10-720673  | 39065684  | 39065692  | -      | 7.43       | Intron (NM_199039, intron 1 of 9)    | 1836            | KLHL5        |
| Hoxc10-1024668 | 128429509 | 128429517 | +      | 7.43       | Intergenic                           | -1951           | CCDC136      |
| Hoxc10-1058485 | 56676596  | 56676604  | +      | 7.43       | Promoter-TSS (NM_001286657)          | -61             | TMEM68       |
| Hoxc10-198182  | 6861873   | 6861881   | -      | 7.42       | Intron (NR_026581, intron 1 of 8)    | 205             | MLF2         |
| Hoxc10-131745  | 106029152 | 106029160 | -      | 7.40       | Promoter-TSS (NR_039702)             | 525             | GSTO2        |
| Hoxc10-241944  | 102513559 | 102513567 | +      | 7.39       | Promoter-TSS (NM_001319996)          | 346             | NUP37        |
| Hoxc10-404485  | 39779697  | 39779705  | +      | 7.39       | Intron (NM_000422, intron 1 of 7)    | 1181            | KRT17        |
| Hoxc10-264906  | 50070868  | 50070876  | -      | 7.39       | Promoter-TSS (NM_001040444)          | -320            | PHF11        |
| Hoxc10-7415    | 33115592  | 33115600  | +      | 7.38       | Intron (NM_001330475, intron 1 of 6) | 595             | ZBTB80S      |
| Hoxc10-933550  | 114289978 | 114289986 | +      | 7.38       | Promoter-TSS (NR_125845)             | -883            | LOC101927768 |
| Hoxc10-1135137 | 95736687  | 95736695  | +      | 7.38       | Promoter-TSS (NM_033086)             | -27             | FGD3         |
| Hoxc10-892909  | 25962208  | 25962216  | +      | 7.38       | Promoter-TSS (NM_006355)             | -705            | TRIM38       |
| Hoxc10-586730  | 48727970  | 48727978  | -      | 7.38       | Non-coding (NR_104218, exon 2 of 4)  | 1761            | UBE2V1       |
| Hoxc10-969339  | 1199023   | 1199031   | -      | 7.35       | Promoter-TSS (NR_110069)             | 828             | ZFAND2A      |
| Hoxc10-127137  | 92680528  | 92680536  | +      | 7.33       | Intron (NM_014391, intron 1 of 8)    | 500             | ANKRD1       |
| Hoxc10-817813  | 36604666  | 36604674  | -      | 7.33       | Intergenic                           | -1787           | SLC1A3       |
| Hoxc10-23615   | 75200859  | 75200867  | -      | 7.33       | Intron (NR_027962, intron 1 of 5)    | -1771           | CRYZ         |
| Hoxc10-323920  | 70826574  | 70826582  | -      | 7.32       | Promoter-TSS (NM_001204090)          | -130            | COX16        |
| Hoxc10-720672  | 39064284  | 39064292  | +      | 7.30       | Exon (NM_199039, exon 1 of 10)       | 436             | KLHL5        |
| Hoxc10-797321  | 185546921 | 185546929 | +      | 7.27       | Promoter-TSS (NR_131967)             | -899            | LVCAT8       |
| Hoxc10-892910  | 25963518  | 25963526  | +      | 7.27       | Intron (NM_006355, intron 2 of 7)    | 605             | TRIM38       |



Table SIII. Continued.

| PeakID         | Start     | End       | Strand | Peak score | Annotation                            | Distance to TSS | Gene name    |
|----------------|-----------|-----------|--------|------------|---------------------------------------|-----------------|--------------|
| Hoxc10-817816  | 36607543  | 36607551  | +      | 7.27       | Intron (NM_001289940, intron 1 of 7)  | 1090            | SLC1A3       |
| Hoxc10-245     | 935121    | 935129    | +      | 7.27       | Exon (NM_021170, exon 2 of 4)         | 427             | HES4         |
| Hoxc10-938035  | 122793789 | 122793797 | +      | 7.27       | Promoter-TSS (NM_020755)              | 731             | PKIB         |
| Hoxc10-120122  | 75935823  | 75935831  | +      | 7.27       | Promoter-TSS (NM_001202449)           | -420            | ADK          |
| Hoxc10-280815  | 78111026  | 78111034  | -      | 7.27       | Intron (NM_003843, intron 1 of 31)    | 1221            | SCEL         |
| Hoxc10-215048  | 45268348  | 45268356  | +      | 7.27       | Intron (NM_001145110, intron 3 of 20) | 1092            | NELL2        |
| Hoxc10-487934  | 55462526  | 55462534  | +      | 7.27       | TTS (NR_039624)                       | 1230            | MIR4426      |
| Hoxc10-256881  | 32604099  | 32604107  | +      | 7.25       | Intron (NR_103839, intron 1 of 3)     | -1334           | FRY          |
| Hoxc10-1018435 | 116500941 | 116500949 | +      | 7.24       | Intergenic                            | -1618           | CAPZA2       |
| Hoxc10-487933  | 55457630  | 55457638  | -      | 7.24       | Intron (NM_152385, intron 1 of 12)    | -1405           | RPS27A       |
| Hoxc10-215074  | 45305967  | 45305975  | -      | 7.24       | Intron (NM_001145110, intron 1 of 20) | 1740            | NELL2        |
| Hoxc10-780953  | 155532378 | 155532386 | -      | 7.24       | Intron (NM_021870, intron 4 of 8)     | 1520            | FGG          |
| Hoxc10-709392  | 18024749  | 18024757  | +      | 7.24       | Intergenic                            | -1255           | LCORL        |
| Hoxc10-1030762 | 144531605 | 144531613 | +      | 7.24       | Intron (NM_001042482, intron 2 of 7)  | 1537            | TPK1         |
| Hoxc10-1025090 | 129934147 | 129934155 | -      | 7.23       | Intron (NM_001163446, intron 1 of 9)  | 1177            | CPA4         |
| Hoxc10-938118  | 122972199 | 122972207 | -      | 7.23       | Intron (NM_032471, intron 2 of 3)     | -1671           | PKIB         |
| Hoxc10-1061975 | 63953584  | 63953592  | +      | 7.23       | Intergenic                            | -1978           | GGH          |
| Hoxc10-3905    | 17529954  | 17529962  | -      | 7.23       | Intergenic                            | -1663           | PADI1        |
| Hoxc10-289052  | 91999065  | 91999073  | +      | 7.22       | Intergenic                            | -1005           | MIR17HG      |
| Hoxc10-988780  | 45810424  | 45810432  | -      | 7.20       | Intergenic                            | -1811           | SEPT7P2      |
| Hoxc10-1058587 | 56987353  | 56987361  | +      | 7.20       | Intergenic                            | -217            | RPS20        |
| Hoxc10-131564  | 105507904 | 105507912 | -      | 7.18       | Promoter-TSS (NM_001023)              | 1371            | SH3PXD2A-AS1 |
| Hoxc10-72135   | 207260620 | 207260628 | +      | 7.17       | Intron (NR_038940, intron 1 of 2)     | -1563           | C4BPB        |
| Hoxc10-72136   | 207260626 | 207260634 | -      | 7.17       | Intergenic                            | -1557           | C4BPB        |
| Hoxc10-1141843 | 111774092 | 111774100 | -      | 7.17       | Intron (NM_003798, intron 1 of 18)    | 1778            | CTNNA1       |
| Hoxc10-383837  | 61091614  | 61091622  | +      | 7.17       | Intergenic                            | -1948           | MIR4426      |
| Hoxc10-1046608 | 25284311  | 25284319  | -      | 7.17       | Intergenic                            | -1759           | GNRH1        |
| Hoxc10-179304  | 93468549  | 93468557  | +      | 7.17       | Promoter-TSS (NR_002973)              | -151            | SNORA40      |
| Hoxc10-199472  | 10366553  | 10366561  | +      | 7.17       | Intron (NM_031412, intron 1 of 3)     | 1068            | GABARAPL1    |
| Hoxc10-886573  | 10724769  | 10724777  | -      | 7.17       | Intron (NM_016462, intron 1 of 5)     | 1625            | TMEM14C      |
| Hoxc10-824226  | 52404343  | 52404351  | -      | 7.17       | Intron (NM_176806, intron 2 of 6)     | 1255            | MOCS2        |
| Hoxc10-1135136 | 95734868  | 95734876  | -      | 7.17       | Intron (NM_001286993, intron 1 of 17) | -1846           | FGD3         |
| Hoxc10-262124  | 43598242  | 43598250  | +      | 7.17       | Intron (NM_013238, intron 1 of 5)     | 884             | DNAJC15      |
| Hoxc10-131747  | 106030319 | 106030327 | +      | 7.17       | Intron (NM_001191013, intron 1 of 5)  | 1692            | GSTO2        |
| Hoxc10-239070  | 96183842  | 96183850  | +      | 7.17       | 5'UTR (NM_001329702, exon 1 of 10)    | 127             | NTN4         |
| Hoxc10-131292  | 104472628 | 104472636 | +      | 7.17       | Intron (NM_004311, intron 1 of 5)     | 1558            | ARL3         |
| Hoxc10-404644  | 40810403  | 40810411  | +      | 7.17       | Promoter-TSS (NM_001320509)           | -859            | TUBG2        |
| Hoxc10-462085  | 46652975  | 46652983  | -      | 7.17       | Intron (NM_001002915, intron 2 of 4)  | 1479            | IGFL2        |
| Hoxc10-836626  | 79947541  | 79947549  | -      | 7.17       | Promoter-TSS (NM_001190470)           | -691            | MTRNR2L2     |

Table SIII. Continued.

| PeakID         | Start     | End       | Strand | Peak score | Annotation                            | Distance to TSS | Gene name    |
|----------------|-----------|-----------|--------|------------|---------------------------------------|-----------------|--------------|
| Hoxc10-406077  | 46509169  | 46509177  | -      | 7.17       | Intergenic                            | -1579           | SKAP1        |
| Hoxc10-547948  | 189157062 | 189157070 | +      | 7.17       | Promoter-TSS (NR_045563)              | -324            | GULP1        |
| Hoxc10-938097  | 122933367 | 122933375 | -      | 7.17       | Intron (NM_181795, intron 1 of 4)     | 1994            | PKIB         |
| Hoxc10-4483    | 20250177  | 20250185  | +      | 7.16       | Promoter-TSS (NM_014589)              | -71             | PLA2G2E      |
| Hoxc10-590664  | 60964042  | 60964050  | -      | 7.16       | TTS (NM_001024)                       | 1925            | RPS21        |
| Hoxc10-289053  | 91999186  | 91999194  | -      | 7.14       | Promoter-TSS (NR_027349)              | -884            | MIR17HG      |
| Hoxc10-483964  | 47403677  | 47403685  | +      | 7.14       | Promoter-TSS (NM_001305624)           | 81              | CALM2        |
| Hoxc10-409856  | 56771690  | 56771698  | +      | 7.13       | Intron (NR_103872, intron 1 of 7)     | 1760            | RAD51C       |
| Hoxc10-1143882 | 117351625 | 117351633 | +      | 7.13       | Intron (NM_004888, intron 1 of 2)     | 1635            | ATP6V1G1     |
| Hoxc10-24126   | 76250139  | 76250147  | -      | 7.13       | Intergenic                            | -1736           | RABGGTB      |
| Hoxc10-835153  | 76508372  | 76508380  | +      | 7.13       | Intron (NM_001029853, intron 1 of 20) | 1670            | PDE8B        |
| Hoxc10-983360  | 32531086  | 32531094  | +      | 7.12       | Promoter-TSS (NR_024466)              | -615            | LSM5         |
| Hoxc10-608032  | 22653501  | 22653509  | +      | 7.12       | Intron (NR_027293, intron 1 of 10)    | 1042            | BMS1P20      |
| Hoxc10-199460  | 10323547  | 10323555  | +      | 7.12       | Intron (NM_001079815, intron 1 of 5)  | 353             | TMEM52B      |
| Hoxc10-638183  | 58483613  | 58483621  | -      | 7.12       | Promoter-TSS (NM_153331)              | -475            | KCTD6        |
| Hoxc10-1133875 | 91925606  | 91925614  | -      | 7.12       | Promoter-TSS (NM_001827)              | -500            | CKS2         |
| Hoxc10-800427  | 996017    | 996025    | -      | 7.12       | Intron (NR_104614, intron 1 of 1)     | 1434            | LOC100506688 |
| Hoxc10-6415    | 28834918  | 28834926  | +      | 7.12       | Promoter-TSS (NR_004404)              | -148            | SNORA73B     |
| Hoxc10-938119  | 122975397 | 122975405 | +      | 7.12       | Intron (NM_001270395, intron 1 of 4)  | 1527            | PKIB         |
| Hoxc10-1061973 | 63953109  | 63953117  | +      | 7.10       | Intergenic                            | -1503           | GGH          |
| Hoxc10-461335  | 43528895  | 43528903  | -      | 7.08       | Exon (NM_002785, exon 2 of 6)         | 1732            | PSG11        |
| Hoxc10-461399  | 43688986  | 43688994  | -      | 7.08       | Exon (NM_002781, exon 2 of 6)         | 1698            | PSG5         |
| Hoxc10-120121  | 75935587  | 75935595  | +      | 7.08       | Promoter-TSS (NM_001202449)           | -656            | ADK          |
| Hoxc10-461292  | 43420329  | 43420337  | -      | 7.08       | Exon (NM_002782, exon 2 of 6)         | 1743            | PSG6         |
| Hoxc10-461301  | 43439608  | 43439616  | -      | 7.08       | Exon (NM_002783, exon 2 of 6)         | 1718            | PSG7         |
| Hoxc10-461408  | 43708090  | 43708098  | -      | 7.08       | Exon (NM_213633, exon 2 of 5)         | 1832            | PSG4         |
| Hoxc10-461357  | 43585085  | 43585093  | -      | 7.08       | Exon (NM_031246, exon 2 of 6)         | 1804            | PSG2         |
| Hoxc10-1118804 | 37591055  | 37591063  | +      | 7.08       | Intron (NM_001001790, intron 1 of 1)  | 1577            | TOMM5        |
| Hoxc10-120119  | 75934674  | 75934682  | -      | 7.07       | Intron (NM_006721, intron 1 of 10)    | -1569           | ADK          |
| Hoxc10-705222  | 6694659   | 6694667   | +      | 7.07       | Promoter-TSS (NM_005980)              | -903            | S100P        |
| Hoxc10-404138  | 38979408  | 38979416  | +      | 7.07       | Promoter-TSS (NM_000421)              | -549            | KRT10        |
| Hoxc10-199461  | 10323980  | 10323988  | -      | 7.07       | Intron (NM_001079815, intron 1 of 5)  | 786             | TMEM52B      |
| Hoxc10-463066  | 52299084  | 52299092  | +      | 7.07       | Intron (NM_002030, intron 1 of 1)     | 689             | FPR3         |
| Hoxc10-817815  | 36606387  | 36606395  | +      | 7.07       | Promoter-TSS (NM_004172)              | -66             | SLC1A3       |
| Hoxc10-556815  | 206546460 | 206546468 | -      | 7.07       | Promoter-TSS (NM_003872)              | -760            | NRP2         |
| Hoxc10-1030764 | 144534860 | 144534868 | -      | 7.07       | Intergenic                            | -1718           | TPK1         |
| Hoxc10-263045  | 45914005  | 45914013  | +      | 7.07       | Intron (NM_003295, intron 3 of 5)     | 1410            | TPST1        |
| Hoxc10-580545  | 23732389  | 23732397  | -      | 7.07       | Promoter-TSS (NM_001898)              | -819            | CST1         |
| Hoxc10-580521  | 23670491  | 23670499  | -      | 7.07       | Promoter-TSS (NM_001899)              | -833            | CST4         |

Table SIII. Continued.

| PeakID         | Start     | End       | Strand | Peak score | Annotation                            | Distance to TSS | Gene name    |
|----------------|-----------|-----------|--------|------------|---------------------------------------|-----------------|--------------|
| Hoxc10-483965  | 47405029  | 47405037  | +      | 7.07       | Promoter-TSS (NM_001305625)           | -958            | CALM2        |
| Hoxc10-1061972 | 63952820  | 63952828  | +      | 7.07       | Intergenic                            | -1214           | GGH          |
| Hoxc10-120120  | 75935209  | 75935217  | +      | 7.07       | Intron (NM_006721, intron 1 of 10)    | -1034           | ADK          |
| Hoxc10-824225  | 52404070  | 52404078  | +      | 7.07       | Intron (NM_176806, intron 2 of 6)     | 1528            | MOC52        |
| Hoxc10-605742  | 45077548  | 45077556  | +      | 7.07       | Intron (NM_007031, intron 2 of 8)     | 1822            | HSF2BP       |
| Hoxc10-1061970 | 63950158  | 63950166  | -      | 7.06       | Intron (NM_003878, intron 1 of 8)     | 1448            | GGH          |
| Hoxc10-988341  | 44059792  | 44059800  | +      | 7.06       | Intergenic                            | -1003           | POLR2J4      |
| Hoxc10-542491  | 179913356 | 179913364 | +      | 7.06       | Intron (NM_173648, intron 1 of 23)    | 1426            | CCDC141      |
| Hoxc10-1211086 | 130963335 | 130963343 | +      | 7.04       | Intron (NR_026975, intron 1 of 12)    | 1332            | FIRRE        |
| Hoxc10-462086  | 46653483  | 46653491  | -      | 7.04       | Intron (NM_001002915, intron 2 of 4)  | 1987            | IGFL2        |
| Hoxc10-415594  | 72198751  | 72198759  | +      | 7.04       | Intergenic                            | -1040           | RPL38        |
| Hoxc10-865888  | 137202166 | 137202174 | +      | 7.04       | Intergenic                            | -1375           | MYOT         |
| Hoxc10-213640  | 42633059  | 42633067  | +      | 7.04       | Promoter-TSS (NM_001320080)           | -893            | YAF2         |
| Hoxc10-23612   | 75199435  | 75199443  | -      | 7.04       | Promoter-TSS (NM_001130042)           | -347            | CRYZ         |
| Hoxc10-690024  | 167451300 | 167451308 | -      | 7.04       | Intron (NM_145859, intron 1 of 8)     | 1290            | PDCD10       |
| Hoxc10-398389  | 16341159  | 16341167  | +      | 7.04       | TTS (NM_016113)                       | -1138           | LRRC75A-AS1  |
| Hoxc10-1103364 | 6644121   | 6644129   | +      | 7.04       | Intron (NM_000170, intron 2 of 24)    | 1567            | GLDC         |
| Hoxc10-215073  | 45305755  | 45305763  | +      | 7.04       | Intron (NM_001145110, intron 1 of 20) | 1952            | NELL2        |
| Hoxc10-265513  | 51482355  | 51482363  | -      | 7.04       | Intron (NR_046552, intron 1 of 2)     | -1455           | RNASEH2B     |
| Hoxc10-262123  | 43596919  | 43596927  | +      | 7.04       | Promoter-TSS (NM_013238)              | -439            | DNAJC15      |
| Hoxc10-317334  | 55035308  | 55035316  | -      | 7.04       | Intron (NM_015589, intron 1 of 11)    | 982             | SAMD4A       |
| Hoxc10-179423  | 93752873  | 93752881  | -      | 7.04       | Intergenic                            | -1501           | HEPPL1       |
| Hoxc10-1143517 | 115912435 | 115912443 | -      | 7.04       | Promoter-TSS (NM_001860)              | -799            | SLC31A2      |
| Hoxc10-412167  | 63098779  | 63098787  | -      | 7.04       | Intron (NR_110801, intron 2 of 2)     | 1853            | LOC100507002 |
| Hoxc10-988340  | 44059727  | 44059735  | +      | 7.04       | Promoter-TSS (NR_003655)              | -938            | POLR2J4      |
| Hoxc10-131563  | 105504881 | 105504889 | +      | 7.02       | Intron (NM_014631, intron 3 of 13)    | -1652           | SH3PXD2A-AS1 |
